1  
2  
3  
4  
5  
6  
7  
8  
9  
10  
11  
12  
13  
14  
15  
16  
17  
18  
19  
20  
21  
22  
23  
24  
25  
26  
27  
28

## **Temporal Viral Genome-Protein Interactions Define Distinct Stages of Productive Herpesviral Infection**

Jill A. Dembowski and Neal A. DeLuca\*

Department of Microbiology and Molecular Genetics, University of Pittsburgh School of  
Medicine, Pittsburgh, Pennsylvania, USA

\*Corresponding author

Neal A. DeLuca

Department of Microbiology and Molecular Genetics

University of Pittsburgh School of Medicine

547 Bridgeside Point II

450 Technology Dr.

Pittsburgh, PA 15219

E-mail: [ndeluca@pitt.edu](mailto:ndeluca@pitt.edu)

Phone:(412) 648-9947

FAX: (421) 624-1401

29  
30  
31  
32  
33  
34  
35  
36  
37  
38  
39  
40  
41  
42  
43  
44  
45  
46  
47

## SUMMARY

Herpesviruses utilize multiple mechanisms to redirect host proteins for use in viral processes and to avoid recognition and repression by the host. To investigate the dynamic interactions between HSV-1 DNA and viral and host proteins, we developed an approach to identify proteins that associate with the infecting viral genome from nuclear entry through packaging. We found that input viral DNA progressed within six hours through four temporal stages where the genomes: 1. interacted with intrinsic and DNA damage response proteins, 2. underwent a robust transcriptional switch mediated largely by ICP4, 3. engaged in replication, repair, and continued transcription, and then 4. transitioned to a more transcriptionally inert state engaging de novo synthesized viral structural components while maintaining interactions with replication proteins. Using a combination of genetic, imaging, and proteomic approaches, we provide a new and temporally compressed view of the HSV-1 life cycle based on genome-proteome dynamics.

**KEYWORDS:** Herpesvirus, Herpes simplex virus 1, HSV, ICP4, iPOND, DNA damage, DNA repair, transcription, DNA isolation, Mediator complex



## 48 INTRODUCTION

49 Herpesviruses are a family of highly prevalent eukaryotic viruses that share strong  
50 evolutionary relationships with their hosts (McGeoch et al., 2006). They have therefore  
51 developed sophisticated mechanisms to invade host cells, alter cellular activities, and redirect  
52 host factors for use in viral processes. Knowledge of how herpesviruses manipulate the host  
53 to evade intrinsic responses to infection, or to utilize host cell resources to drive productive  
54 infection or the establishment of latency, is crucial for understanding their life cycles.

55 Herpes simplex virus type 1 (HSV-1) is a ubiquitous human pathogen that infects the  
56 majority of the human population. Initial productive infection occurs in epithelial cells where  
57 the viral genome is prolifically transcribed and replicated, resulting in many new virus  
58 progeny. The virus can also gain access to sensory neurons, where it can undergo  
59 productive infection or establish reversible latency (Roizman and Whitley, 2013). During  
60 latency, most of the viral genome is transcriptionally repressed and no progeny are made.  
61 Thus, processes that occur on the viral genome largely determine the outcome of infection.

62 Nuclear stages of productive infection involve coordinated events occurring on the viral  
63 genome, which begin with the transfer of viral DNA into the host nucleus through the nuclear  
64 pore shortly after infection (Tognon et al., 1981). Once in the nucleus, the viral genome is  
65 subject to the opposing actions of the intrinsic antiviral response mediated at PML nuclear  
66 bodies (NBs), and the counteracting functions of viral proteins, particularly ICP0 (Everett et  
67 al., 2006; Maul et al., 1993). A coordinated and sequential cascade of expression of three  
68 temporal classes of viral genes ensues (Hones and Roizman, 1974, 1975). The transcription  
69 of immediate early (IE) viral genes is activated by the viral tegument protein VP16 (Batterson  
70 and Roizman, 1983; Campbell et al., 1984), transcription of early and late viral genes is  
71 activated by the IE gene product ICP4 (DeLuca et al., 1985; Dixon and Schaffer, 1980;  
72 Watson and Clements, 1980), and transcription of late viral genes is coupled to viral DNA  
73 replication by an unknown mechanism. IE gene products include regulatory proteins, early  
74 gene products include the viral replication machinery, and late gene products mostly  
75 comprise the structural components of the virus (Hones and Roizman, 1974, 1975).  
76 Replicated DNA is packaged into preassembled capsids, which subsequently exit the  
77 nucleus. How these events are staged with respect to the actions of viral and cellular protein  
78 complexes acting on the viral genome is unclear. This is mostly due to issues of sensitivity in  
79 the measurements of processes occurring during single step growth, and the fact that time of  
80 occurrence of crucial events can be obscured by events that are more quantitatively robust.

81 To examine events that occur on viral genomes, we previously developed an approach  
82 based on iPOND (Sirbu et al., 2012) to selectively label replicating viral DNA within infected  
83 cells with ethynyl-modified nucleotides (EdC or EdU) to enable the covalent conjugation to  
84 biotin-azide or Alexa Fluor-azide (Dembowski and DeLuca, 2015). Biotinylated DNA is  
85 purified on streptavidin coated beads followed by the identification of associated proteins by  
86 mass spectrometry. Furthermore, Alexa Fluor modified genomes can be imaged in cells  
87 relative to specific host or viral proteins. These approaches were used to establish  
88 spatiotemporal relationships between specific viral and cellular proteins and the replicating  
89 HSV-1 genome and reveal the potential involvement of host factors in processes that occur  
90 on nascent viral DNA during relatively late stages of productive infection (Dembowski and  
91 DeLuca, 2015; Dembowski et al., 2017). These and other studies also demonstrate that it is  
92 possible to track infecting viral genomes that have been pre-labeled with ethynyl-modified  
93 nucleotides by imaging approaches (Alandijany et al., 2018; Dembowski and DeLuca, 2015;  
94 Sekine et al., 2017; Wang et al., 2013).

95 Herein we used viral genome purification and imaging approaches to investigate  
96 dynamic changes that occur on the original infecting viral genome during distinct stages of  
97 infection. HSV-1 structural and tegument proteins from the infecting virus are associated with  
98 the infecting viral genome early during infection. As infection proceeds, the same structural  
99 proteins are synthesized in the infected cell and then again become associated with viral  
100 genomes. Therefore, we utilized stable isotope labeling of amino acids in cell culture (SILAC)  
101 to differentiate between proteins that originate in the infecting virion and proteins that were  
102 synthesized within the infected cell. Additionally, we performed this analysis on both wild type  
103 virus and a virus that does not synthesize ICP4, to investigate changes that mediate a robust  
104 transcriptional switch early during infection. Using a combination of genetic, imaging, and  
105 proteomic approaches, we have tracked the fate of input viral genomes within the nuclei of  
106 host cells throughout the entire course of infection and defined several crucial steps that  
107 occur early in the productive HSV-1 life cycle.

108

## 109 **RESULTS**

### 110 **Input Viral Genomes Can Be Tracked from Nuclear Entry Through Packaging**

111 To investigate the protein landscape associated with input viral DNA, wild type HSV-1 (KOS)  
112 stocks were prepared in the presence of EdC to label viral genomes, which enables  
113 subsequent imaging or purification of input viral DNA after infection. EdC-labeling resulted in

114 an approximately three-fold increase in the genome/plaque forming unit (PFU) ratio (Table  
115 S1), suggesting that incorporation of EdC into viral DNA results in a modest decrease in  
116 infectivity.

117 To demonstrate the sensitivity and specificity of viral genome labeling, Vero cells were  
118 infected with EdC-labeled KOS (KOS-EdC) and fixed at various times after infection. Fixed  
119 cells were subject to click chemistry and immunofluorescence to visualize the relative location  
120 of input viral DNA and ICP4 within the host nuclei (Figure 1A). At 1 hour post infection (hpi),  
121 viral genomes were observed at the perimeter of the nuclear membrane as they entered into  
122 the nucleus through the nuclear pore. By 2 hpi, ICP4 was expressed and colocalized with  
123 most if not all viral genome foci. From 3-12 hpi, after the onset of viral DNA replication, ICP4  
124 foci representing replication compartments grew in size, while input genomes contained  
125 within these foci could still be distinguished as discrete puncta. At later times, input viral DNA  
126 appeared to coalesce and migrate to the perimeter of replication compartments. Together  
127 these data demonstrate the specificity of the click chemistry approach for tracing the fate of  
128 the input viral genome throughout the course of infection (Figure 1B).

129 To investigate the ordered protein interactions that occur on input viral DNA, human  
130 MRC-5 fibroblast cell nuclei were harvested at specific times after infection with KOS-EdC  
131 and viral DNA was covalently attached to biotin and purified using streptavidin-coated beads  
132 followed by mass spectrometry (MS) to identify associated proteins (Figure 1C, Table S2). To  
133 compare the relative abundance of identified proteins, spectral abundance factors (SAF:  
134 spectral counts/molecular weight) were calculated for each protein and plotted in order of  
135 relative abundance in mature virions (Figure 1C, Virion). For comparison, proteins found to  
136 associate with viral replication compartments were also graphed (6 hpi +EdC) (Dembowski  
137 and Deluca, 2017). SILAC was carried out to distinguish between factors that originated in  
138 the infecting virion (light amino acids) and factors that were expressed within the infected  
139 cells either prior to or during infection (heavy amino acids). Relative intensities of amino acids  
140 were compared (Figure 1C) and input genome associated proteins were distinguished as  
141 heavy (H), light (L), or intermediate (I) and to have therefore originated in the infected cell,  
142 virion, or both. SILAC MS analysis of viral proteins was highly reproducible (Figure S1A).

143 At 1 hpi, viral genomes associated with light capsid and tegument proteins that were  
144 brought into the cell with the infecting virion. Immediate early viral gene products (ICPs 0, 4,  
145 22, and 27) are expressed by 1 hpi (Harkness et al., 2014) and were found to associate with  
146 infecting viral genomes by 2 hpi (Figure 1C, highlighted in purple). ICP8 was the first viral

147 replication factor to associate by 2 hpi and additional replication factors were detected by 3  
148 hpi (UL42, UL30, UL9, highlighted in tan), the time at which viral genomes begin to replicate  
149 (Dembowski et al., 2017). Replication factors are not abundant in the virion, and were  
150 therefore expressed de novo subsequent to infection and generally contained heavy amino  
151 acids. At later times (6 hpi), viral genomes were found to associate with newly expressed viral  
152 structural proteins, including capsid proteins VP5, VP19, VP23, and UL6 (highlighted in red).  
153 A clear transition from light to heavy capsid proteins was observed by 6 hpi, and nascent  
154 capsid proteins associated with these genomes in roughly the same relative abundance as  
155 they constitute intact capsids (Figure S1B) (Gibson and Roizman, 1972; Newcomb et al.,  
156 1993). Therefore, some population of the input viral DNA was repackaged by this time.

157 Co-staining of input genomes, ICP4, and the major viral tegument protein (VP5)  
158 demonstrates that labeled input genomes are released from capsids docked at the nuclear  
159 membrane at early stages of infection (1 hpi); these genomes associate with ICP4 by 2 hpi;  
160 nascent VP5, a late gene product, accumulates in the nucleus by 4 hpi; and input genomes  
161 colocalize with VP5 associated with replication compartments by 6 hpi (Figure S2). Taken  
162 together, temporal viral genome-viral protein interactions observed in these studies are  
163 consistent with known events in the virus life cycle and demonstrate the sensitivity,  
164 specificity, and reproducibility of the input viral genome purification approach.

165

### 166 **Host Proteins Associated with Input Genomes upon Nuclear Entry**

167 Host proteins in the MS datasets of affinity purified input genomes are listed in Table S2. To  
168 further demonstrate the reproducibility of this assay to determine the relative abundance of  
169 factors associated with viral DNA, the SAF values of individual proteins from duplicate  
170 experiments were plotted to determine the Pearson correlation coefficient of replicate  
171 experiments (Figure S3). In all cases, the correlation coefficient was at least 0.92,  
172 demonstrating a linear relationship between data points and a general consistent trend in  
173 relative yield of individual factors using this approach. Although many experimental variables  
174 govern whether a protein will be captured and identified using this technique, results are  
175 consistent between replicate experiments and there is high confidence in the presence of  
176 identified factors.

177 No host factors were reproducibly found to contain peptides labeled with light amino  
178 acids. Therefore, we conclude that cellular proteins associated with viral genomes at early  
179 stages of infection do not originate from the infecting virus particle. Potential interactions

180 amongst viral genome associated host factors identified by MS were illustrated using the  
181 STRING protein-protein interaction network database (Snel et al., 2000). One hour after  
182 infection, host proteins identified to associate with viral DNA include the catalytic subunit of  
183 host Pol II (POLR2A), factors that play roles in transcription regulation and RNA processing  
184 (INTS1, USP39, SRRT, DDX23, THOC7), core components of PML NBs (PML, SP100,  
185 SUMO2), factors involved in the regulation of chromatin structure (HP1BP3, HIST1H1A,  
186 HIST1H1E, CHD4, CSNK2A1, SUPT16H, SMARCC2, SMARCA4, TRRAP), and factors that  
187 are recruited to damaged DNA (PARP1, PARP14, RPA1, LIG3). Identified host factors  
188 illustrate the processes that occur on HSV-1 genomes shortly after entry into the nucleus: 1)  
189 transcription of IE viral genes, 2) association with PML NBs and components of cellular  
190 chromatin, and 3) recognition by the host cell as DNA damage.

191 To determine if multiple processes occur on each genome, or if these results reflect  
192 the existence of mixed populations of viral DNA engaged in different processes at 1 hpi, we  
193 carried out co-staining for a protein involved in viral repression (PML) and the core subunit of  
194 Pol II (POLR2A) (Figure 2B). We demonstrate that individual viral genome foci are associated  
195 with both PML and Pol II, but that PML and Pol II do not colocalize with each other. This is  
196 consistent with the observation that viral genomes are juxtaposed to PML NBs at this time  
197 (Ishov and Maul, 1996). We cannot distinguish between whether individual foci contain more  
198 than one genome. However, because these foci appear to originate from a single capsid  
199 focus (Figure S2), we hypothesize that the viral genome foci represent individual genomes at  
200 early times post infection (1-2 hpi). Taken together, viral genomes are recognized by the cell  
201 as DNA damage early during infection and are associated with PML NBs. However, portions  
202 of the viral genome can escape repression to enable the transcription of IE viral genes.

203

#### 204 **Robust Transcription Factor Recruitment to Viral Genomes Occurs Coincident with the** 205 **Binding of ICP4**

206 After two hours, PML NBs are dispersed through the actions of ICP0, and ICP4 associates  
207 with the viral genome to activate transcription of early viral genes. In this study, nascent ICP4  
208 was found to associate with input viral genomes (Figure 1C), and PML components (PML,  
209 SP100, SUMO2) were no longer detected by 2 hpi (Figure 3A). At this time, several host  
210 factors involved in host cell transcription were found to associate with viral DNA. These  
211 include components of the host Mediator (MED1, 6, 12, 14, 16, 17, 20, 23, 24, 25, 27) and  
212 Integrator (INTS1, 2, 3, 4, 6, 7, 10 and CPSF3L) complexes, as well as factors that regulate

213 transcription elongation (SSRP1, SPT16H, SUPT5H, SUPT6H) and RNA processing. With  
214 the exception of POLR2A, INTS1, and THOC7, associated transcription and RNA processing  
215 factors were not detected before 2 hours and were therefore potentially recruited through the  
216 actions of ICP4, another IE viral gene product, or as a result of alterations in viral genome  
217 architecture. It is also possible that small amounts of these complexes are recruited to the  
218 genome earlier through the action of VP16, but are present below the limits of detection. We  
219 previously demonstrated that ICP4 interacts with the Mediator complex and was required for  
220 the recruitment of Mediator components to viral promoters (Lester and DeLuca, 2011).  
221 Furthermore, the IE gene product ICP22 is required for the recruitment of SSRP1 to viral  
222 DNA (Fox et al., 2017). To verify the timing of recruitment of Mediator to viral DNA, we co-  
223 stained infected cells for infecting viral genomes and the Mediator component Med23 (Figure  
224 3B). Med23 did not colocalize with viral genomes by 1 hpi but did colocalize by 2 hpi,  
225 validating the MS results.

226 Furthermore, by 2 hpi, TP53BP1 and IFI16 were also found to associate with viral  
227 genomes, as well as components of the nuclear lamina (LEMD2, EMD, LMNB1, LMNB2) and  
228 the cohesin complex (SMC1A, SMC3, STAG2, PDS5B). Interestingly, the nuclear lamina may  
229 play a role in the reduction of heterochromatin on viral genes (Silva et al., 2008). Taken  
230 together, there is an obvious switch in viral genome architecture that occurs between 1 and 2  
231 hpi that likely mediates the onset of early viral gene expression and sets the stage for viral  
232 genome replication.

233

### 234 **ICP4 Facilitates Transcription Factor Recruitment**

235 To investigate the role ICP4 plays in the recruitment of host transcription factors to viral DNA,  
236 stocks of the ICP4 mutant, n12 (DeLuca and Schaffer, 1988), were prepared by propagating  
237 the virus in the presence of EdC. EdC labeling of n12 in the ICP4 complementing cell line E5  
238 resulted in a two-fold increase in the genome/PFU ratio (Table S1). Therefore, as observed  
239 for wild type KOS, viral genome labeling resulted in a modest decrease in n12 infectivity. To  
240 verify that EdC-labeling was specific, n12-EdC infected cells were subject to  
241 immunofluorescence (Figure S4). Viral genomes were observed at the perimeter of the  
242 nucleus at 3 hpi (n12, Vero, 3 hpi) and did not progress to form replication compartments  
243 unless ICP4 was supplied in trans (n12, E5, 6 hpi). Therefore, the analysis of n12-EdC  
244 infection should enable the investigation of changes that occur on the viral genome as a  
245 consequence of ICP4 association.



246 MRC-5 cells were infected with n12-EdC and proteins that associated with the genome  
247 at 3 hpi were determined as described above. Identified viral proteins were graphed relative  
248 to viral proteins found to associate with KOS-EdC viral genomes at this time (Figure 4). A  
249 small amount of ICP4 was purified with n12 viral genomes. We conclude that this population  
250 of ICP4 was carried into the cell as part of the viral tegument because it was enriched in light  
251 amino acids. MS of purified virions also revealed that ICP4 is a component of mature n12  
252 virions, which contain the same protein composition as KOS virions (Figure S5). n12 infected  
253 cells do not efficiently express early viral genes including, ICP8, UL42, UL9, or UL30 and as  
254 a consequence these proteins were not abundantly associated with n12 viral genomes which  
255 do not undergo viral DNA replication in noncomplementing cells (DeLuca and Schaffer,  
256 1988).

257 To establish the requirement of ICP4 for the recruitment of host factors to viral DNA,  
258 we compared the average SAFs of human proteins enriched on n12 and KOS viral genomes  
259 at 3hpi (Figure 5A). Proteins that fell within the 90% confidence interval of the linear  
260 regression line were considered to be enriched on both KOS and n12 viral genomes. Proteins  
261 that fell outside of this confidence interval were considered to be enriched on KOS and not  
262 n12 viral genomes (red) or enriched on n12 and not KOS viral genomes (green). The  
263 identified proteins were further grouped based on their biological function and the average  
264 SAF values of proteins within each group were compared between KOS and n12 infected  
265 cells (Figure 5B). Processes that were enriched on KOS over n12 genomes are shown in red  
266 and processes that were enriched on n12 over KOS genomes are shown in green. To further  
267 illustrate the differences in individual proteins that were more enriched on KOS or n12 viral  
268 genomes (Figure 5A), STRING maps were generated (Figures 5C, D). From these data, we  
269 conclude that ICP4 is required for the recruitment of the Mediator complex (Figure 5C, dark  
270 red) to viral DNA, as well as several transcription elongation factors (tan: CDK9, SUPT5H,  
271 SUPT6H) and factors that are enriched at viral replication forks (dark orange: TOP2A, PCNA,  
272 MRE11) (Dembowski et al., 2017). However, in the absence of ICP4 there is an increase in  
273 factors that recognize DNA damage (Figure 5D, light green: PARP9, DTX3L, PARP1,  
274 XRCC6, RPA1, RPA2), RNA processing factors (light blue), the FACT complex (dark blue:  
275 SSRP1, SPT16H), as well as histones and chromatin remodeling factors (dark green).  
276 Consistent with MS results, we did not observe the recruitment of Med23 to n12 viral  
277 genomes by immunofluorescence (Figure 3B). Taken together, ICP4 association with viral  
278 DNA triggers a significant change in viral genome architecture resulting in a transition from a

279 state involving chromatin repression and recognition as DNA damage to a state associated  
280 with robust transcription and viral DNA replication.

281

## 282 **Host Proteins Associated with Input Viral Genomes at the Onset of Viral DNA** 283 **Replication**

284 We previously detected viral DNA replication in infected MRC-5 cells as early as 3 hpi  
285 (Dembowski et al., 2017). Furthermore, this was the earliest time at which viral replication  
286 factors UL30, UL9, and UL42 were detected to associate with viral DNA (Figure 1C and  
287 Table S2). To investigate host factors that associate with infecting viral genomes immediately  
288 after or during the onset of viral DNA replication, host proteins associated with input viral  
289 DNA at 3 hpi were identified. At this time, we observed the association of the TFIIH  
290 component ERCC3, the Pol II kinase CDK9, and Mediator component Med31 with viral DNA  
291 (Figure 6A). ERCC3 and CDK9 were previously shown to associate with replicated HSV-1  
292 DNA (Dembowski et al., 2017), are known to have roles in the active transcription of cellular  
293 genes, and may therefore play a role in activating late viral gene expression. ERCC3, CDK9,  
294 and Med31 were not found to associate with viral DNA, at least within the limits of detection  
295 by this method, in the absence of ICP4 (Figure 5C), suggesting that ICP4 may play a role in  
296 recruiting these factors.

297 After 3 hours, we also observed the association of PCNA and the topoisomerase  
298 subunit TOP2A with viral DNA (Figure 6A and B). The MRN double strand break repair  
299 complex members MRE11A and RAD50 also associated at this time (Figure 6A). Consistent  
300 with previous observations, all of these factors have been shown to associate with replicated  
301 viral DNA (Dembowski and DeLuca, 2015; Dembowski et al., 2017). The functions of host  
302 repair proteins and PCNA on replicating HSV-1 DNA are not known, however it has  
303 previously been demonstrated that PCNA and MRE11 are required for efficient viral DNA  
304 replication (Lilley et al., 2005; Sanders et al., 2015). Taken together, at the onset of viral DNA  
305 replication, another unique set of factors associate with input viral genomes. These factors  
306 likely play a role in replication-coupled processes such as the repair of damaged DNA,  
307 recombination, or activation of late gene transcription.

308

## 309 **Heterogeneity of Genomes at Late Times Post Infection**

310 At 6 hpi, we observed the robust association of infecting viral genomes with many host  
311 factors (Figure 7A, Table S2). These include the cohesin complex, cytoskeletal proteins,



312 components of the nuclear lamina, DNA repair proteins, RNA processing factors, and factors  
313 that regulate chromatin structure. Newly associated proteins include recombination (RECQL),  
314 base excision repair (BER) (APEX, XRCC1), and mismatch repair (MMR) (MSH2) proteins,  
315 suggesting that viral genomes undergo repair and recombination at this time. Input viral  
316 genomes continue to associate with viral replication factors at 6 hpi and therefore at least  
317 some population of input viral DNA continues to undergo DNA replication. It is likely that BER  
318 and MMR occur on nascent viral DNA associated with input viral genomes in the act of DNA  
319 replication. Consistent with this hypothesis, we previously observed the association of these  
320 factors with replicated viral DNA (Dembowski and DeLuca, 2015). Another population of viral  
321 genomes appear to be packaged into capsids composed of nascent viral proteins (Figure 1C)  
322 and it may also be this population that associates with microtubule associated proteins  
323 (Figure 7A MAP1A, MAP1B, DYNLL1, CKAP5) at this time. Microtubule associated proteins  
324 may facilitate the transport of nascent nucleocapsids. One striking observation is that input  
325 genomes exhibit reduced association with several transcription factors including the Mediator  
326 complex, Integrator complex, and Pol II but increased or continued association with factors  
327 that regulate chromatin architecture, including NuRD, B-WICH, Swi/Snf, and FACT (Figure  
328 7B). While the functions of chromatin remodeling factors on viral DNA at this time are  
329 unknown, the decrease in Pol II levels suggests that transcription is likely reduced from input  
330 viral genomes. Taken together, input viral genomes are present in mixed populations by 6  
331 hpi, whereby some genomes continue to replicate, while others are processed and packaged  
332 into virions.

333

## 334 **DISCUSSION**

335 Infecting viral genomes are acted on by host and viral proteins to facilitate sequential  
336 steps in infection. Here, we developed and utilized an approach to investigate the origin and  
337 temporal association of viral and host proteins with input HSV-1 genomes from nuclear entry  
338 through repackaging into nascent capsids within 6 hours (Figure 1B). These studies provide a  
339 new and temporally compressed view of the life cycle of HSV-1 based on the dynamics of the  
340 genomic proteome, and provide new evidence for the involvement of specific host factors in  
341 each step.

342

## 343 **Tracking Viral Protein Dynamics**

344 Early during infection, viral genomes associate with capsid and tegument proteins that  
345 originate from the infecting virus (Figure 1C, 1-3 hpi, capsid proteins highlighted in red).  
346 However, compared to purified virions (Virion), viral genomes purified after infection are not  
347 associated with an abundance of viral glycoproteins and therefore enveloped virus particles.  
348 It has previously been demonstrated that the click reaction can only access viral genomes  
349 after release from the capsid through the nuclear pore (Sekine et al., 2017) or partial  
350 denaturation to disrupt capsid integrity (Alandijany et al., 2018). Therefore, at early times,  
351 viral genome associated capsid proteins isolated from nuclei likely associate with viral DNA  
352 docked and uncoating at the nuclear pore (Figure S2, 1-3 hpi). Later during infection, nascent  
353 capsid proteins that were synthesized after infection and therefore contain heavy amino acids  
354 associate with viral genomes (Figure 1C, 6 hpi) in a similar relative abundance as they  
355 constitute intact capsids (Figure S1B). Therefore, while some of input genome foci present at  
356 6 hours may represent genomes that have not progressed through the infection process as  
357 previously proposed (Sekine et al., 2017), our data support a model whereby some  
358 population of input viral DNA begins to be repackaged by 6 hpi, putting an upper limit on the  
359 minimum time necessary for completion of the nuclear events in productive infection.

360 Identified interactions with regulatory viral factors are consistent with previous  
361 information regarding the virus life cycle. VP16 from the infecting virion associates with viral  
362 DNA early during infection (Figure 1C) to mediate expression of IE viral genes (Batterson and  
363 Roizman, 1983; Campbell et al., 1984). Nascent IE gene products associate with viral  
364 genomes as early as 2 hpi (Figure 1C, IE proteins highlighted in purple). IE gene products,  
365 including ICP4, drive the expression of early genes (DeLuca et al., 1985; Dixon and Schaffer,  
366 1980; Watson and Clements, 1980). Early genes encode the viral replication machinery  
367 (highlighted in tan), which are expressed and associate with viral genomes between 2-3 hpi.  
368 Consistent with previous observations, ICP8 was the first replication protein to associate  
369 (Quinlan et al., 1984). By 6 hpi, replication factors are present on input viral genomes in the  
370 same relative abundance as in viral replication compartments (Figure 1C, 6 hpi +EdC),  
371 suggesting that another population of the input viral DNA is actively engaged in DNA  
372 replication during this time.

373

### 374 **Viral Genomes are Recognized as DNA Damage by the Host**

375 Viral genomes enter into the nucleus as linear, naked DNA containing nicks and gaps (Wilkie,  
376 1973). The host responds to the invading DNA by attempting to both deposit some form of

377 chromatin on the viral genome and by triggering the recruitment of factors to initiate the repair  
378 of damaged DNA. Early during infection, the host also triggers an antiviral response, which is  
379 significantly abrogated during infection by the actions of ICP0. We visualized genomes  
380 entering into nuclei by 1 hpi (Figure 1A) and found that these genomes associate with factors  
381 that have previously been established for their role in the intrinsic response to infection.  
382 These includes components of PML NBs (PML, SP100, SUMO2), which are enriched on viral  
383 genomes by 1 hpi (Figure 2A) but no longer detected by 2 hpi (Figure 3A). By 2 hpi, PML  
384 NBs are dispersed through the actions of ICP0 (Everett et al., 1998; Everett et al., 2006). The  
385 effects PML NBs exert on viral DNA are not known. However, PML has been shown to  
386 contribute to antiviral repression in the absence of ICP0 (Alandijany et al., 2018; Everett et  
387 al., 2006).

388 Early during infection viral genomes also associate with factors that have known roles  
389 in the recognition or processing of DNA breaks including RPA1, PARP1, PARP14, and  
390 Ligase 3 (LIG3) (Figure 2A). RPA1 associates with input viral genomes early during infection  
391 and remains associated throughout (Figures 2A, 3A, 6A, 7A). RPA1 has been shown to be  
392 recruited to HSV-1 and human cytomegalovirus genomes during infection (Fortunato and  
393 Spector, 1998; Wilcock and Lane, 1991) and is sometimes associated with a subset of PML  
394 NBs (Dellaire and Bazett-Jones, 2004). An interesting observation from these studies is that  
395 at least 4x more RPA1 associates with input viral genomes throughout the course of infection  
396 compared to replicated viral DNA and 9x more associates with n12 input genomes compared  
397 to replicated wild type viral DNA (Table S2). It is possible that RPA1 binds to genomes that  
398 do not progress through the infectious cycle but are present in a repressed state, or that there  
399 is a unique feature of input genomes, such as nicks and gaps or ends, that enable enhanced  
400 binding of RPA1. In the future, it would be interesting to investigate the function of RPA1  
401 during early versus late stages of infection and to determine where specifically it associates  
402 with viral DNA.

403 PARP1 and PARP14 add polyADP-ribose (PAR) or monoADP-ribose (MAR) groups,  
404 respectively, to target proteins. PARP proteins have been implicated in a wide variety of  
405 cellular processes including modification of chromatin, transcription regulation, DNA damage  
406 recognition and repair, and promoting inflammatory responses (Kim et al., 2005). In addition  
407 to PARP1 and PARP14, PARP9 and its binding partner DTX3L (an E3 ubiquitin ligase) were  
408 found to associate with viral genomes in the absence of ICP4 (Figure 5D). PARP9 is a  
409 catalytically inactive protein that modulates interferon gamma-STAT1 signaling (Kim et al.,

410 2005). Further analysis of the functions of PARP proteins in viral infection is an important  
411 area for future research.

412 At 2 hpi, we detected IFI16 associated with input viral genomes (Figure 3) and  
413 demonstrate that detectable recruitment is dependent on the association of ICP4 with viral  
414 DNA (Figure 5). Previous studies demonstrated that the association of IFI16 with viral DNA  
415 coincides with ICP4 recruitment (Alandijany et al., 2018; Everett, 2016). IFI16 binds to HSV-1  
416 DNA and promotes interferon  $\beta$  signaling (Li et al., 2012; Orzalli et al., 2012; Unterholzner et  
417 al., 2010). IFI16 is either directly or indirectly targeted by ICP0 during infection (Cuchet-  
418 Lourenco et al., 2013; Orzalli et al., 2012). However, we and others were still able to detect  
419 IFI16 associated with viral DNA in the presence of ICP0 (Li et al., 2012; Orzalli et al., 2015),  
420 suggesting that these effects are not absolute. In contrast, we did not observe recruitment to  
421 viral DNA of other factors that are known targets of ICP0 including DNA-PKcs, RNF8, and  
422 RNF168 (Lilley et al., 2010; Parkinson et al., 1999).

423 After the onset of viral DNA replication (3 hpi), we detected the topoisomerase TOP2A,  
424 MRN complex members MRE11 and RAD50, MMR protein MSH2, BER proteins APEX1 and  
425 XRCC1, recombination protein RECQL, and PCNA associated with viral DNA (Figure 6A and  
426 7A). These data are consistent with our previous observations that TOP2A and MRN complex  
427 members are recruited to replicating viral DNA and that MMR proteins and PCNA are  
428 recruited to viral replication forks in a replication-dependent manner (Dembowski and  
429 DeLuca, 2015; Dembowski et al., 2017). MRE11, MSH2, and PCNA have previously been  
430 shown to be required for HSV-1 DNA replication (Lilley et al., 2005; Mohni et al., 2011  
431 Sanders, 2015 #97). Furthermore, MRN complex members interact with the viral alkaline  
432 nuclease, UL12, and have been proposed to play a role in viral recombination during DNA  
433 replication (Balasubramanian et al., 2010).

434 Together these data illustrate the timing of association of specific DNA damage  
435 response and repair proteins with viral genomes. The time of association likely corresponds  
436 to the structure of the viral genome during each stage of infection. Early on the genome has  
437 ends, nicks, and gaps, which are recognized as DNA breaks by host repair proteins. At the  
438 same time, factors that mediate intrinsic responses to infection bind. These processes are  
439 countered by the actions of ICP0, which disrupts PML NBs and blocks homologous  
440 recombination by targeting RNF8 and RNF168 for proteosomal degradation. During DNA  
441 replication the genome is subject to recombination and replication-coupled repair, at which

442 time factors that act in these processes associate. The requirement of some of these factors  
443 for productive viral infection has been demonstrated in the past. However, the functional  
444 consequences of these interactions are not known.

445

### 446 **A Robust Transcriptional Switch**

447 IE proteins are expressed and subsequently bind to the viral genome by 2 hpi (Figure 1C). At  
448 this time, we observed the recruitment of several host transcription factors to viral DNA  
449 including the Mediator complex, the Integrator complex, and factors that facilitate co-  
450 transcriptional processing of RNA (Figure 3A). Mediator acts as a transcriptional coactivator  
451 of most cellular genes (Allen and Taatjes, 2015). The Integrator complex is has multiple roles  
452 in host transcription regulation including promoter proximal pause and release following  
453 initiation (Gardini et al., 2014; Stadelmayer et al., 2014), enhancer RNA biogenesis (Lai et al.,  
454 2015), and snRNA 3' end formation (Chen and Wagner, 2010). Integrator has been shown to  
455 regulate the processing of Herpesvirus saimiri microRNAs (Cazalla et al., 2011) and to  
456 associate with nascent HSV-1 viral DNA (Dembowski and DeLuca, 2015; Dembowski et al.,  
457 2017). The observation that Integrator is enriched on HSV-1 genomes throughout infection  
458 suggests that it plays an important role in viral transcription or co-transcriptional RNA  
459 processing.

460 We demonstrate that robust recruitment of the Mediator complex, Pol II, transcription  
461 elongation factors, and replication proteins is ICP4 dependent (Figures 4 and 5). ICP4 is  
462 required for the expression of early viral genes, which encode the viral replication machinery,  
463 explaining the role of ICP4 in replication protein recruitment. ICP4 has been shown to interact  
464 with TFIID (Carrozza and DeLuca, 1996) and Mediator (Lester and DeLuca, 2011), and  
465 copurifies with factors involved in chromatin remodeling, transcription elongation, and RNA  
466 processing (Wagner and DeLuca, 2013). We have also shown that ICP4 is required for the  
467 binding of components of Mediator and TFIID to viral promoters (Grondin and DeLuca, 2000;  
468 Lester and DeLuca, 2011; Sampath and Deluca, 2008). Here we demonstrate that all  
469 Mediator components are either missing or significantly reduced on viral DNA in the absence  
470 of ICP4. Therefore, it is likely that the robust recruitment of Mediator by ICP4 drives Pol II  
471 recruitment and expression of early and potentially late viral genes. Taken together, ICP4  
472 mediates a robust transcriptional switch that occurs between 1 and 2 hpi to mediate  
473 expression of early and potentially late classes of viral genes.

474 After the onset of DNA replication (3 hpi) another set of transcription factors are  
475 recruited, which include the Pol II kinase CDK9, TFIID component ERCC3, and PAF complex  
476 member CTR9 (Figure 6). Recruitment of all of these factors was also dependent on ICP4  
477 (Figure 5). It is possible that these factors play some role in promoting late gene expression  
478 after the onset of viral DNA replication or this switch may be mediated by some change in  
479 viral genome architecture that occurs at this stage of infection.

480 Interestingly, by 6 hpi, there is a dramatic decrease in viral genome associated  
481 transcription factors including Pol II, Mediator, and Integrator (Figure 7B). Perhaps at this  
482 time transcription is reduced on input genomes to facilitate viral DNA packaging and/or DNA  
483 replication. However, there still an abundance of RNA processing factors present. This is  
484 consistent with replication fork pulse chase data (Dembowski et al., 2017), in which  
485 transcription factors were more enriched on replication forks and RNA processing factors  
486 were more abundant on nascent viral DNA. These data may provide insight into the  
487 mechanism of replication coupled late gene transcription, suggesting that the initiation of  
488 transcription is closely linked to act of DNA replication.

489 Another abundant group of proteins associated with viral genomes throughout  
490 infection are factors that regulate chromatin structure, including the B-Wich, Swi/Snf, NuRD,  
491 and FACT complexes (Figure 7B). In general, the abundance of factors that regulate  
492 chromatin increase on input genomes with time. Perhaps these factors function to remove  
493 histones from replicated viral genomes or keep them from binding in the first place allowing  
494 for late gene expression. Several of the chromatin remodeling factors identified have ATPase  
495 activity including SMARCA5, SMARCA1, SMARCA4, SMARCC3, and CHD4. An additional  
496 hypothesis is that these factors act to strip proteins off of viral genomes to enable packaging  
497 of viral DNA into nascent capsids where there is a lack of proteins associated with the viral  
498 DNA.

499

## 500 **A Powerful Approach to Investigate Viral Infection**

501 In this study, we present an approach to investigate viral infection from a new and powerful  
502 perspective. We define the stages in viral life cycle by the sets of viral and cellular proteins  
503 that associate with the input genome, and hence the processes that occur on it. These stages  
504 were defined from the perspective of the infecting viral genome, which because DNA  
505 replication is semi-conservative, could be tracked from when the genome first uncoats until it  
506 is packaged in progeny virions. We also utilized a virus that does not express ICP4 (n12) to



507 identify host factors associated with a robust transcriptional switch that mediates early viral  
508 gene expression. Information regarding viral genome dynamics not only provide new insight  
509 into the involvement of viral and host proteins in processes that occur on viral DNA, but also  
510 can lead to the development of new antivirals that target these proteins.

511

## 512 **ACKNOWLEDGEMENTS**

513 We acknowledge Hannah Fox and Sarah Dremel for thoughtful discussions related to this  
514 project and Frances Sivrich for technical assistance. This work was funded by NIH grants  
515 R01AI030612 and AI44812 to NAD and R21AI137652 to JAD.

516

## 517 **AUTHOR CONTRIBUTIONS**

518 JAD and NAD conceived of and designed the study, NAD supervised the project and  
519 provided materials and resources, JAD developed and optimized the methodology, JAD and  
520 NAD performed experiments, JAD analyzed the data, prepared the figures, and wrote the  
521 manuscript, JAD and NAD reviewed and edited the manuscript.

522

## 523 **DECLARATION OF INTERESTS**

524 The authors declare no competing interests.

525

## 526 **REFERENCES**

527 Alandijany, T., Roberts, A.P.E., Conn, K.L., Loney, C., McFarlane, S., Orr, A., and Boutell, C.  
528 (2018). Distinct temporal roles for the promyelocytic leukaemia (PML) protein in the  
529 sequential regulation of intracellular host immunity to HSV-1 infection. *PLoS pathogens* *14*,  
530 e1006769.

531

532 Allen, B.L., and Taatjes, D.J. (2015). The Mediator complex: a central integrator of  
533 transcription. *Nat Rev Mol Cell Biol* *16*, 155-166.

534

535 Balasubramanian, N., Bai, P., Buchek, G., Korza, G., and Weller, S.K. (2010). Physical  
536 interaction between the herpes simplex virus type 1 exonuclease, UL12, and the DNA  
537 double-strand break-sensing MRN complex. *Journal of virology* *84*, 12504-12514.

538

539 Batterson, W., and Roizman, B. (1983). Characterization of the herpes simplex virion-  
540 associated factor responsible for the induction of alpha genes. *Journal of virology* *46*, 371-  
541 377.

542

543 Campbell, M.E., Palfreyman, J.W., and Preston, C.M. (1984). Identification of herpes simplex  
544 virus DNA sequences which encode a trans-acting polypeptide responsible for stimulation of  
545 immediate early transcription. *Journal of molecular biology* *180*, 1-19.

546  
547 Carrozza, M.J., and DeLuca, N.A. (1996). Interaction of the viral activator protein ICP4 with  
548 TFIID through TAF250. *Molecular and cellular biology* 16, 3085-3093.  
549  
550 Cazalla, D., Xie, M., and Steitz, J.A. (2011). A primate herpesvirus uses the integrator  
551 complex to generate viral microRNAs. *Molecular cell* 43, 982-992.  
552  
553 Chen, J., and Wagner, E.J. (2010). snRNA 3' end formation: the dawn of the Integrator  
554 complex. *Biochem Soc Trans* 38, 1082-1087.  
555  
556 Cuchet-Lourenco, D., Anderson, G., Sloan, E., Orr, A., and Everett, R.D. (2013). The viral  
557 ubiquitin ligase ICP0 is neither sufficient nor necessary for degradation of the cellular DNA  
558 sensor IFI16 during herpes simplex virus 1 infection. *Journal of virology* 87, 13422-13432.  
559  
560 Dellaire, G., and Bazett-Jones, D.P. (2004). PML nuclear bodies: dynamic sensors of DNA  
561 damage and cellular stress. *BioEssays : news and reviews in molecular, cellular and*  
562 *developmental biology* 26, 963-977.  
563  
564 DeLuca, N.A., McCarthy, A.M., and Schaffer, P.A. (1985). Isolation and characterization of  
565 deletion mutants of herpes simplex virus type 1 in the gene encoding immediate-early  
566 regulatory protein ICP4. *Journal of virology* 56, 558-570.  
567  
568 DeLuca, N.A., and Schaffer, P.A. (1988). Physical and functional domains of the herpes  
569 simplex virus transcriptional regulatory protein ICP4. *Journal of virology* 62, 732-743.  
570  
571 Dembowski, J.A., and DeLuca, N.A. (2015). Selective recruitment of nuclear factors to  
572 productively replicating herpes simplex virus genomes. *PLoS pathogens* 11, e1004939.  
573  
574 Dembowski, J.A., and Deluca, N.A. (2017). Purification of Viral DNA for the Identification of  
575 Associated Viral and Cellular Proteins. *J Vis Exp*.  
576  
577 Dembowski, J.A., Dremel, S.E., and DeLuca, N.A. (2017). Replication-Coupled Recruitment  
578 of Viral and Cellular Factors to Herpes Simplex Virus Type 1 Replication Forks for the  
579 Maintenance and Expression of Viral Genomes. *PLoS pathogens* 13, e1006166.  
580  
581 Dixon, R.A., and Schaffer, P.A. (1980). Fine-structure mapping and functional analysis of  
582 temperature-sensitive mutants in the gene encoding the herpes simplex virus type 1  
583 immediate early protein VP175. *Journal of virology* 36, 189-203.  
584  
585 Everett, R.D. (2016). Dynamic Response of IFI16 and Promyelocytic Leukemia Nuclear Body  
586 Components to Herpes Simplex Virus 1 Infection. *Journal of virology* 90, 167-179.  
587  
588 Everett, R.D., Freemont, P., Saitoh, H., Dasso, M., Orr, A., Kathoria, M., and Parkinson, J.  
589 (1998). The disruption of ND10 during herpes simplex virus infection correlates with the  
590 Vmw110- and proteasome-dependent loss of several PML isoforms. *Journal of virology* 72,  
591 6581-6591.  
592



- 593 Everett, R.D., Rechter, S., Papior, P., Tavalai, N., Stamminger, T., and Orr, A. (2006). PML  
594 contributes to a cellular mechanism of repression of herpes simplex virus type 1 infection that  
595 is inactivated by ICP0. *Journal of virology* *80*, 7995-8005.  
596
- 597 Fortunato, E.A., and Spector, D.H. (1998). p53 and RPA are sequestered in viral replication  
598 centers in the nuclei of cells infected with human cytomegalovirus. *Journal of virology* *72*,  
599 2033-2039.  
600
- 601 Fox, H.L., Dembowski, J.A., and DeLuca, N.A. (2017). A Herpesviral Immediate Early Protein  
602 Promotes Transcription Elongation of Viral Transcripts. *MBio* *8*.  
603
- 604 Gardini, A., Baillat, D., Cesaroni, M., Hu, D., Marinis, J.M., Wagner, E.J., Lazar, M.A.,  
605 Shilatifard, A., and Shiekhattar, R. (2014). Integrator regulates transcriptional initiation and  
606 pause release following activation. *Molecular cell* *56*, 128-139.  
607
- 608 Gibson, W., and Roizman, B. (1972). Proteins specified by herpes simplex virus. 8.  
609 Characterization and composition of multiple capsid forms of subtypes 1 and 2. *Journal of*  
610 *virology* *10*, 1044-1052.  
611
- 612 Grondin, B., and DeLuca, N. (2000). Herpes simplex virus type 1 ICP4 promotes transcription  
613 preinitiation complex formation by enhancing the binding of TFIID to DNA. *Journal of virology*  
614 *74*, 11504-11510.  
615
- 616 Harkness, J.M., Kader, M., and DeLuca, N.A. (2014). Transcription of the herpes simplex  
617 virus 1 genome during productive and quiescent infection of neuronal and nonneuronal cells.  
618 *Journal of virology* *88*, 6847-6861.  
619
- 620 Honess, R.W., and Roizman, B. (1974). Regulation of herpesvirus macromolecular synthesis.  
621 I. Cascade regulation of the synthesis of three groups of viral proteins. *Journal of virology* *14*,  
622 8-19.  
623
- 624 Honess, R.W., and Roizman, B. (1975). Regulation of herpesvirus macromolecular synthesis:  
625 sequential transition of polypeptide synthesis requires functional viral polypeptides.  
626 *Proceedings of the National Academy of Sciences of the United States of America* *72*, 1276-  
627 1280.  
628
- 629 Ishov, A.M., and Maul, G.G. (1996). The periphery of nuclear domain 10 (ND10) as site of  
630 DNA virus deposition. *J Cell Biol* *134*, 815-826.  
631
- 632 Kim, M.Y., Zhang, T., and Kraus, W.L. (2005). Poly(ADP-ribosylation) by PARP-1: 'PAR-  
633 laying' NAD<sup>+</sup> into a nuclear signal. *Genes & development* *19*, 1951-1967.  
634
- 635 Lai, F., Gardini, A., Zhang, A., and Shiekhattar, R. (2015). Integrator mediates the biogenesis  
636 of enhancer RNAs. *Nature* *525*, 399-403.  
637
- 638 Lester, J.T., and DeLuca, N.A. (2011). Herpes simplex virus 1 ICP4 forms complexes with  
639 TFIID and mediator in virus-infected cells. *Journal of virology* *85*, 5733-5744.  
640

- 641 Li, T., Diner, B.A., Chen, J., and Cristea, I.M. (2012). Acetylation modulates cellular  
642 distribution and DNA sensing ability of interferon-inducible protein IFI16. *Proceedings of the*  
643 *National Academy of Sciences of the United States of America* *109*, 10558-10563.  
644
- 645 Lilley, C.E., Carson, C.T., Muotri, A.R., Gage, F.H., and Weitzman, M.D. (2005). DNA repair  
646 proteins affect the lifecycle of herpes simplex virus 1. *Proceedings of the National Academy*  
647 *of Sciences of the United States of America* *102*, 5844-5849.  
648
- 649 Lilley, C.E., Chaurushiya, M.S., Boutell, C., Landry, S., Suh, J., Panier, S., Everett, R.D.,  
650 Stewart, G.S., Durocher, D., and Weitzman, M.D. (2010). A viral E3 ligase targets RNF8 and  
651 RNF168 to control histone ubiquitination and DNA damage responses. *The EMBO journal* *29*,  
652 943-955.  
653
- 654 Maul, G.G., Guldner, H.H., and Spivack, J.G. (1993). Modification of discrete nuclear  
655 domains induced by herpes simplex virus type 1 immediate early gene 1 product (ICP0). *The*  
656 *Journal of general virology* *74 ( Pt 12)*, 2679-2690.  
657
- 658 McGeoch, D.J., Rixon, F.J., and Davison, A.J. (2006). Topics in herpesvirus genomics and  
659 evolution. *Virus research* *117*, 90-104.  
660
- 661 Mellacheruvu, D., Wright, Z., Couzens, A.L., Lambert, J.P., St-Denis, N.A., Li, T., Miteva,  
662 Y.V., Hauri, S., Sardi, M.E., Low, T.Y., *et al.* (2013). The CRAPome: a contaminant  
663 repository for affinity purification-mass spectrometry data. *Nat Methods* *10*, 730-736.  
664
- 665 Mohni, K.N., Mastrocola, A.S., Bai, P., Weller, S.K., and Heinen, C.D. (2011). DNA mismatch  
666 repair proteins are required for efficient herpes simplex virus 1 replication. *Journal of virology*  
667 *85*, 12241-12253.  
668
- 669 Newcomb, W.W., Trus, B.L., Booy, F.P., Steven, A.C., Wall, J.S., and Brown, J.C. (1993).  
670 Structure of the herpes simplex virus capsid. Molecular composition of the pentons and the  
671 triplexes. *Journal of molecular biology* *232*, 499-511.  
672
- 673 Orzalli, M.H., Broekema, N.M., Diner, B.A., Hancks, D.C., Elde, N.C., Cristea, I.M., and  
674 Knipe, D.M. (2015). cGAS-mediated stabilization of IFI16 promotes innate signaling during  
675 herpes simplex virus infection. *Proceedings of the National Academy of Sciences of the*  
676 *United States of America* *112*, E1773-1781.  
677
- 678 Orzalli, M.H., DeLuca, N.A., and Knipe, D.M. (2012). Nuclear IFI16 induction of IRF-3  
679 signaling during herpesviral infection and degradation of IFI16 by the viral ICP0 protein.  
680 *Proceedings of the National Academy of Sciences of the United States of America* *109*,  
681 E3008-3017.  
682
- 683 Parkinson, J., Lees-Miller, S.P., and Everett, R.D. (1999). Herpes simplex virus type 1  
684 immediate-early protein vmw110 induces the proteasome-dependent degradation of the  
685 catalytic subunit of DNA-dependent protein kinase. *Journal of virology* *73*, 650-657.  
686
- 687 Quinlan, M.P., Chen, L.B., and Knipe, D.M. (1984). The intranuclear location of a herpes  
688 simplex virus DNA-binding protein is determined by the status of viral DNA replication. *Cell*  
689 *36*, 857-868.

690

691 Roizman, B., and Whitley, R.J. (2013). An inquiry into the molecular basis of HSV latency and  
692 reactivation. *Annu Rev Microbiol* 67, 355-374.

693

694 Sampath, P., and Deluca, N.A. (2008). Binding of ICP4, TATA-binding protein, and RNA  
695 polymerase II to herpes simplex virus type 1 immediate-early, early, and late promoters in  
696 virus-infected cells. *Journal of virology* 82, 2339-2349.

697

698 Sanders, I., Boyer, M., and Fraser, N.W. (2015). Early nucleosome deposition on, and  
699 replication of, HSV DNA requires cell factor PCNA. *Journal of neurovirology* 21, 358-369.

700

701 Sekine, E., Schmidt, N., Gaboriau, D., and O'Hare, P. (2017). Spatiotemporal dynamics of  
702 HSV genome nuclear entry and compaction state transitions using bioorthogonal chemistry  
703 and super-resolution microscopy. *PLoS pathogens* 13, e1006721.

704

705 Shepard, A.A., Tolentino, P., and DeLuca, N.A. (1990). trans-dominant inhibition of herpes  
706 simplex virus transcriptional regulatory protein ICP4 by heterodimer formation. *Journal of*  
707 *virology* 64, 3916-3926.

708

709 Showalter, S.D., Zweig, M., and Hampar, B. (1981). Monoclonal antibodies to herpes simplex  
710 virus type 1 proteins, including the immediate-early protein ICP 4. *Infect Immun* 34, 684-692.

711

712 Silva, L., Cliffe, A., Chang, L., and Knipe, D.M. (2008). Role for A-type lamins in herpesviral  
713 DNA targeting and heterochromatin modulation. *PLoS pathogens* 4, e1000071.

714

715 Sirbu, B.M., Couch, F.B., and Cortez, D. (2012). Monitoring the spatiotemporal dynamics of  
716 proteins at replication forks and in assembled chromatin using isolation of proteins on  
717 nascent DNA. *Nature protocols* 7, 594-605.

718

719 Snel, B., Lehmann, G., Bork, P., and Huynen, M.A. (2000). STRING: a web-server to retrieve  
720 and display the repeatedly occurring neighbourhood of a gene. *Nucleic acids research* 28,  
721 3442-3444.

722

723 Stadlmayer, B., Micas, G., Gamot, A., Martin, P., Malirat, N., Koval, S., Raffel, R., Sobhian,  
724 B., Severac, D., Rialle, S., *et al.* (2014). Integrator complex regulates NELF-mediated RNA  
725 polymerase II pause/release and processivity at coding genes. *Nat Commun* 5, 5531.

726

727 Tognon, M., Furlong, D., Conley, A.J., and Roizman, B. (1981). Molecular genetics of herpes  
728 simplex virus. V. Characterization of a mutant defective in ability to form plaques at low  
729 temperatures and in a viral fraction which prevents accumulation of coreless capsids at  
730 nuclear pores late in infection. *Journal of virology* 40, 870-880.

731

732 Unterholzner, L., Keating, S.E., Baran, M., Horan, K.A., Jensen, S.B., Sharma, S., Sirois,  
733 C.M., Jin, T., Latz, E., Xiao, T.S., *et al.* (2010). IFI16 is an innate immune sensor for  
734 intracellular DNA. *Nat Immunol* 11, 997-1004.

735

736 Wagner, L.M., and DeLuca, N.A. (2013). Temporal association of herpes simplex virus ICP4  
737 with cellular complexes functioning at multiple steps in PolII transcription. *PLoS one* 8,  
738 e78242.

739

740 Wang, I.H., Suomalainen, M., Andriasyan, V., Kilcher, S., Mercer, J., Neef, A., Luedtke, N.W.,  
741 and Greber, U.F. (2013). Tracking viral genomes in host cells at single-molecule resolution.  
742 *Cell Host Microbe* 14, 468-480.

743

744 Watson, R.J., and Clements, J.B. (1980). A herpes simplex virus type 1 function continuously  
745 required for early and late virus RNA synthesis. *Nature* 285, 329-330.

746

747 Wilcock, D., and Lane, D.P. (1991). Localization of p53, retinoblastoma and host replication  
748 proteins at sites of viral replication in herpes-infected cells. *Nature* 349, 429-431.

749

750 Wilkie, N.M. (1973). The synthesis and substructure of herpesvirus DNA: the distribution of  
751 alkali-labile single strand interruptions in HSV-1 DNA. *The Journal of general virology* 21,  
752 453-467.

753

## 754 **FIGURE LEGENDS**

### 755 **Figure 1. The Fates of Input Viral Genomes can be Tracked within Infected Cell Nuclei.**

756 A. Visualization of input viral DNA. Cells were fixed at indicated times after infection with  
757 KOS-EdC (1-12 hpi). Viral genomes (green) and ICP4 (red) were imaged relative to host  
758 nuclei (blue). Optical sections were deconvolved (Decon) to generate high resolution images  
759 and rendered (Render) to illustrate the positions of input viral DNA. Scale bars represent 5  
760  $\mu\text{m}$ . B. Model depicting the fate of input viral genomes during distinct stages of infection.  
761 Input viral DNA is shown in green and replicated viral DNA in black. For MS experiments,  
762 input virions and the infected cell contain proteins labeled with light or heavy amino acids,  
763 respectively. C. Abundance of viral genome associated viral proteins throughout infection.  
764 Viral genome associated viral proteins were detected by MS after a 1, 2, 3, or 6 hour infection  
765 with KOS-EdC. SAFs were plotted relative to individual proteins associated with mature  
766 virions (Virion) and viral replication compartments that were labeled with EdC from 4-6 hpi  
767 (6hpi +EdC) (Dembowski et al., 2017). Proteins were distinguished as either heavy (H, red),  
768 light (L, teal), or intermediate (I, orange) by SILAC analysis. In cases where SILAC analysis  
769 was not carried out, bar graphs are shown in gray. IE viral proteins are highlighted in purple,  
770 viral replication proteins in tan, and capsid proteins in red. Data represent results from one of  
771 two biological replicates. See also Tables S1 and S2, Figures S1 and S2.

772

### 773 **Figure 2. Host DNA Damage Response Factors and Pol II Associate with Input Viral**

774 **Genomes by 1 hpi.** A. Graphic illustration of predicted physical and functional interactions  
775 between human proteins that associate with HSV-1 genomes at 1 hpi with KOS-EdC. Colors

776 indicate the biological processes in which identified proteins are likely involved and the  
777 unmapped list includes proteins that were not mapped using STRING. B. Input viral genome  
778 foci simultaneously associate with Pol II and PML. KOS-EdC infected MRC-5 cells were fixed  
779 at 1 hpi and subject to click chemistry to label input viral DNA (green), Hoechst staining to  
780 label nuclei, and indirect immunofluorescence to label Pol II (POLR2A, red) and PML (blue).  
781 All panels represent different views of the same nucleus, which is outlined in white. Arrows  
782 indicate the location of input viral genomes and the corner box includes a 3x zoomed in  
783 image of the area indicated by the arrow head. Viral DNA was omitted from the top panel (-  
784 Viral DNA) and the location of input viral genome foci is outlined by a dashed circle in the  
785 zoomed in image. Viral DNA foci were included in the bottom panel (+Viral DNA). See also  
786 Figure S3 and Table S2.

787

788 **Figure 3. Robust Recruitment of Host Transcription Factors to Input Viral DNA. A.**

789 Illustration of predicted physical and functional interactions between human proteins that  
790 associate with HSV-1 genomes at 2 hpi with KOS-EdC. B. Input viral genome foci associate  
791 with Med23 starting around 2 hpi. KOS-EdC or n12-EdC infected MRC-5 cells were fixed at  
792 the indicated times and subject to click chemistry to label input viral DNA (green), Hoechst  
793 staining to label nuclei (blue), and indirect immunofluorescence to label Med23 (red). See  
794 also Figure S3 and Table S2.

795

796 **Figure 4. ICP4 is Required for the Expression and Subsequent Association of Early,**

797 **but not IE, Viral Gene Products with Input Viral Genomes.** Viral genome associated viral  
798 proteins were detected by MS at 3 hpi with KOS-EdC or n12-EdC. Proteins were  
799 distinguished as either heavy (H, red), light (L, teal), or intermediate (I, orange) by SILAC  
800 analysis. See also Tables S1 and S2, Figures S1, S4, and S5.

801

802 **Figure 5. ICP4 is Required for the Recruitment of Host Transcription and Replication**

803 **Factors to Input Viral DNA. A.** Relative enrichment of human proteins associated with n12-  
804 EdC versus KOS-EdC genomes. Each point represents an individual viral genome  
805 associated host protein with the average spectral abundance on KOS-EdC at 3 hpi plotted on  
806 the x-axis and the average spectral abundance on n12-EdC at 3 hpi plotted on the y-axis.  
807 The linear regression line was forced through zero and the 90% confidence interval is shown.  
808 Proteins that fell outside of this confidence interval were considered to be relatively more

809 enriched on KOS (red) or n12 (green) viral genomes. B. Viral genome associated host  
810 proteins were grouped based on their biological function and the average SAF values of  
811 proteins within each group were compared between KOS-EdC and n12-EdC infected cells.  
812 Processes that were >1.5 fold more enriched on KOS viral genomes are shown in red and  
813 processes that were >1.5 fold more enriched on n12 viral genomes are shown in green. C-D.  
814 Graphic illustration of predicted physical and functional interactions between human proteins  
815 that were relatively more enriched on KOS-EdC viral genomes compared to n12-EdC (C) or  
816 n12-EdC viral genomes compared to KOS-EdC (D). See also Table S2 and Figure S3.

817

818 **Figure 6. Additional Host Factors are Recruited to Input Viral DNA at 3 hpi.** A. Graphic  
819 illustration of predicted physical and functional interactions between human proteins that  
820 associate with KOS-EdC genomes at 3 hpi. B. Input viral genome foci associate with PCNA  
821 at 3 hpi. KOS-EdC infected MRC-5 cells were fixed at 1, 2, 3, or 6 hpi and subject to click  
822 chemistry to label input viral DNA (green), Hoechst staining to label nuclei (blue), and indirect  
823 immunofluorescence to label PCNA (red). See also Table S2 and Figure S3.

824

825 **Figure 7. Levels of Host Transcription Factors are Selectively Reduced on Input Viral**  
826 **DNA at 6 hpi.** A. Graphic illustration of predicted physical and functional interactions between  
827 human proteins that associate with HSV-1 genomes at 6 hpi with KOS-EdC. B. Spectral  
828 abundance (SAF) of select viral genome associated host proteins that function in  
829 transcription regulation. Viral genome associated host proteins were detected by MS at 1, 2,  
830 3, or 6 hpi with KOS-EdC. Proteins that associate with viral replication compartments that  
831 were labeled with EdC from 4-6 hpi (6hpi +EdC) are also shown (Dembowski et al., 2017).  
832 Note that KDMA1 is associated with the NuRD complex but is not a core component. See  
833 also Table S2 and Figure S3.

834

## 835 **METHODS**

### 836 **Cells and Viruses**

837 Experiments were performed using MRC-5 human embryonic lung (CCL-171) or Vero African  
838 green monkey kidney (CCL-81) cells obtained from and propagated as recommended by  
839 ATCC. The viruses used in this study include the wild type HSV-1 strain, KOS, as well as the  
840 ICP4 mutant virus, n12 (DeLuca and Schaffer, 1988). n12 virus stocks were prepared and  
841 titered in the Vero-based ICP4 complementing cell line, E5.



842

### 843 **Virus Purification for Analysis of Virion-Associated Proteins**

844 Confluent monolayers of Vero or E5 cells ( $2 \times 10^8$  cells) were infected with KOS or n12,  
845 respectively, at a multiplicity of infection (MOI) of 5 plaque forming units (PFU)/cell. After 24  
846 hours, infected cells were scraped into the medium. The medium containing the infected cells  
847 was adjusted to 0.5M NaCl and incubated on ice for 45 min. The cells were pelleted at  
848  $3,000 \times g$  for 15 min at  $4^\circ\text{C}$ . The supernatant was then filtered through a 0.8 micron filter and  
849 the filtrate was centrifuged at  $25,000 \times g$  for 2h at  $4^\circ\text{C}$ . The virus-containing pellets were  
850 allowed to resuspend overnight in TBS. Benzonase was added to the virus sample, which  
851 was allowed to incubate for 30 min at  $37^\circ\text{C}$ . The virus was then layered onto a preformed 30-  
852 65% (W/V) sucrose gradient. The gradients were centrifuged in an SW41Ti rotor at 20,000  
853 RPM overnight at  $4^\circ\text{C}$ . One milliliter fractions were collected from the bottom. Ten microliters  
854 of each fraction were incubated overnight in 90  $\mu\text{L}$  of 0.6% SDS and 400  $\mu\text{g/ml}$  proteinase K  
855 at  $37^\circ\text{C}$ . The digested samples were diluted 1000-fold, and 4  $\mu\text{L}$  of each diluted sample was  
856 assayed for viral DNA by real-time (RT)-PCR. The peak of viral DNA corresponded to  
857 fractions just below the middle of the tube, which also corresponds to the density of HSV-1.  
858 The peak fractions were diluted with TBS and centrifuged in the SW41Ti rotor at 24,000 RPM  
859 for 2h at  $4^\circ\text{C}$ . The supernatant was discarded and the pellets allowed to resuspend in a small  
860 volume overnight at  $4^\circ\text{C}$ . Virus titer and genome number were determined by plaque assay  
861 and RT-PCR, respectively. Viral proteins were denatured in SDS sample buffer and viral  
862 protein constituents were determined by MS (Figure 1C (Virion), Figure S5, and Table S2  
863 (Virion))

864

### 865 **Preparation of EdC-Labeled Virus Stocks**

866 Confluent monolayers of  $2 \times 10^8$  Vero or E5 cells were infected with KOS or n12 virus,  
867 respectively, at an MOI of 10 PFU/cell at  $37^\circ\text{C}$  for 1h. After rinsing with TBS to remove  
868 unadsorbed virus, medium was replaced with Dulbecco's Modified Eagle Medium (DMEM)  
869 containing 5% fetal bovine serum (FBS). Four hours later, EdC was added at a final  
870 concentration of 5-10  $\mu\text{M}$ . Monolayers were harvested 34-36 hours after infection, freeze-  
871 thawed three times at  $-80^\circ\text{C}$ , sonicated, and clarified by low-speed centrifugation. Viral  
872 supernatants were passed over a G-25 column to remove residual EdC. Viral titers were  
873 determined by plaque assay on Vero or E5 cells and viral genome number was determined

874 by RT-PCR using primers specific for the viral thymidine kinase gene as described previously  
875 (Harkness et al., 2014) (Table S1).

876

### 877 **Viral Genome Imaging and Immunofluorescence**

878 A total of  $2 \times 10^5$  Vero or MRC-5 cells were grown on glass coverslips in 12-well dishes.  
879 Infections were carried out using EdC-labeled virus stocks at an MOI of 10 PFU/cell in 100  $\mu$ l  
880 TBS for 1h at room temperature (RT). After infection, inoculum was removed and cells were  
881 rinsed with 1 ml TBS prior to addition of 1 ml DMEM plus 5% FBS. Infections were carried out  
882 at 37°C for the indicated period of time. Cells were fixed with 3.7% formaldehyde for 15 min,  
883 washed two times with 1x PBS, permeabilized with 0.5% Triton-X 100 for 20 min, and  
884 blocked with 3% bovine serum albumin (BSA) for 30 min. EdC-labeled DNA was conjugated  
885 to Alexa Fluor 488 azide using the Click-iT EdU imaging kit according to manufacturer's  
886 protocol (Life Technologies). Cells were rinsed with PBS plus 3% BSA, then PBS, labeled  
887 with Hoechst 33342 (1:2000 dilution) for 30 min, washed two times with PBS, then incubated  
888 with primary antibody and Alexa Fluor 594-conjugated secondary antibodies (Santa Cruz,  
889 1:500) as described previously (Wagner and DeLuca, 2013). ICP4 antibodies include the  
890 mouse monoclonal antibody 58S (Figure 1A and S4) (Showalter et al., 1981) and the rabbit  
891 polyclonal antibody N15 (Figure S2). 58S only recognizes the dimeric form of ICP4, which  
892 binds to viral DNA (Shepard et al., 1990). Images were obtained using an Olympus Fluoview  
893 FV1000 confocal microscope. For images in Figure 1A, background subtraction and  
894 subsequent deconvolution of each Z stack was performed manually using Huygens Essential  
895 software (Scientific Volume Imaging BV). Imaris software (Bitplane AG) was used for image  
896 rendering.

897

### 898 **SILAC Labeling and Affinity Purification of Viral Genomes**

899 Prior to infection, MRC-5 cells were propagated for at least three passages in medium  
900 containing heavy amino acids (L-arginine  $^{13}\text{C}_6$   $^{15}\text{N}_4$  and L-Lysine  $^{13}\text{C}_6$   $^{15}\text{N}_2$ ) while virus stocks  
901 used to infect the cells were prepared in the presence of non-isotopically labeled or light  
902 amino acids. Confluent monolayers ( $\sim 7 \times 10^7$ ) of these cells were infected with EdC-labeled  
903 KOS or n12 virus at an MOI of 10 PFU/cell for one hour at RT. After adsorption, the inoculum  
904 was removed and cells were rinsed with RT TBS before SILAC growth medium was replaced.  
905 Cells were incubated at 37°C for 1-6 hours. For each sample there was a corresponding



906 negative control, in which SILAC cells were infected with virus that was not pre-labeled with  
907 EdC using the same infection conditions. Harvesting nuclei from infected cells, biotin  
908 conjugation to EdC-labeled viral genomes by click chemistry, nuclear lysis, DNA  
909 fragmentation, streptavidin purification, and elution of associated proteins were carried out as  
910 described (Dembowski and Deluca, 2017; Dembowski et al., 2017).

911

## 912 **Mass Spectrometry and Data Analysis**

913 MS was carried out by MS Bioworks. The entire sample was separated ~1.5 cm on a 10%  
914 Bis-Tris Novex mini-gel (Invitrogen) using the MES buffer system. The gel was stained with  
915 coomassie and excised into ten equally sized segments. Gel segments were processed using  
916 a robot (ProGest, DigiLab) with the following protocol. First, segments were washed with 25  
917 mM ammonium bicarbonate followed by acetonitrile. Next, they were reduced with 10 mM  
918 dithiothreitol at 60°C followed by alkylation with 50 mM iodoacetamide at RT. Samples were  
919 then digested with trypsin (Promega) at 37°C for 4 h and quenched with formic acid. Each gel  
920 digest was analyzed by nano liquid chromatography with tandem MS (LC/MS/MS) with a  
921 Waters NanoAcquity HPLC system interfaced to a ThermoFisher Q Exactive. Peptides were  
922 loaded on a trapping column and eluted over a 75 µm analytical column at 350 nL/min, which  
923 were both packed with Luna C18 resin (Phenomenex). The mass spectrometer was operated  
924 in a data-dependent mode, with MS and MS/MS performed in the Orbitrap at 70,000 FWHM  
925 resolution and 17,500 FWHM resolution, respectively. The fifteen most abundant ions were  
926 selected for MS/MS.

927 For protein identification, data were searched using Mascot and Mascot DAT files  
928 were parsed into the Scaffold software for validation, filtering, and to create a non-redundant  
929 list per sample. Data were filtered at 1% protein and peptide level false discovery rate (FDR)  
930 and requiring at least two unique peptides per protein. Viral proteins with at least five spectral  
931 counts (SpC), enriched by at least two-fold over the unlabeled negative control, and present  
932 in two biological replicates were considered to be enriched on viral DNA (Table S2). In cases  
933 where no SpCs were detected in the negative control, the denominator was set to 1 to  
934 determine the fold enrichment of viral genome associated proteins. Host factors with at least  
935 5 SpCs, enriched by at least three-fold over the unlabeled negative control, and present in  
936 two biological replicates were considered to be enriched on viral DNA. For human proteins  
937 that are common contaminants of affinity purification-MS datasets (Mellacheruvu et al.,

938 2013), the threshold for confident detection was increased to a five-fold relative enrichment  
939 compared to the unlabeled negative control.

940 For SILAC analysis, data were processed through the MaxQuant software 1.5.1.0 to  
941 recalibrate MS data, filter the database at the 1% protein and peptide FDR, and to calculate  
942 SILAC heavy/light (H/L) ratios. Proteins were distinguished as either heavy or light based on  
943 a two-fold enrichment of heavy or light peptides, respectively. Proteins that fell between this  
944 range were labeled as intermediate (I). Identified proteins were displayed graphically using  
945 GraphPad Prism or Tableau software. Potential physical and functional protein-protein  
946 interactions amongst proteins identified with high confidence were illustrated using the  
947 STRING protein-protein interaction network database (Snel et al., 2000). String diagrams  
948 were modified in Adobe Illustrator for optimal data presentation.

949

## 950 **SUPPLEMENTAL INFORMATION**

### 951 **Figure S1. Viral Protein Identification and SILAC Analysis are Highly Reproducible. A.**

952 Viral genome associated viral proteins were detected by MS after a 1, 2, 3, or 6 hour infection  
953 with KOS-EdC or n12-EdC and SAFs of individual proteins were plotted. Proteins were  
954 distinguished as either heavy (H, red), light (L, teal), or intermediate (I, orange) by SILAC  
955 analysis. Biological replicates reveal the reproducibility of both protein identification and  
956 SILAC MS. B. Nascent capsid proteins associate with input genomes in roughly the same  
957 relative abundance as they constitute intact capsids at 6 hpi. The abundance of capsid  
958 proteins within B capsids was determined previously (Gibson and Roizman, 1972; Newcomb  
959 et al., 1993) and the graphed values correspond to the number of copies of the protein  
960 multiplied by the molecular weight. The intensity of heavy peptides was determined by SILAC  
961 analysis of capsid proteins found to associate with input viral genomes at 6 hpi. VP26 was  
962 not detected in these studies. Related to Figures 1 and 4 and Table S2.

963

### 964 **Figure S2. Localization of the HSV-1 Major Capsid Protein Relative to Input Viral DNA 965 and ICP4 Throughout Infection.**

966 Cells were fixed at indicated times after infection with KOS-  
967 EdC (1-6 hpi) or mock infection. Viral genomes (green), ICP4 (blue), and the major capsid  
968 protein VP5 (red) were imaged relative to host nuclei (dashed lines). Arrows indicate the  
969 positions of input viral DNA. The box in the corner of each image includes a 3.5x zoomed in  
970 image of the region indicated by the arrow head. Related to Figure 1.

970

971 **Figure S3. MS Analysis is Reproducible.** Comparison of the SAFs of individual proteins  
972 found to associate with viral genomes at 1, 2, 3, or 6 hpi with KOS-EdC or n12-EdC. Each  
973 point represents an individual protein with the SAF from the first biological replicate plotted on  
974 the x-axis and the SAF from the second biological replicate plotted on the y-axis. The linear  
975 regression line is shown for reference and r represents the calculated Pearson correlation  
976 coefficient, which indicates the similarity between replicate experiments. Sample KOS +EdC  
977 6 hpi includes previously published data in which replicating viral DNA was labeled with EdC  
978 from 4-6 hpi to enable the subsequent purification of nascent viral DNA (Dembowski and  
979 Deluca, 2017). Related to Figures 2, 3, 5, 6, and 7.

980

981 **Figure S4. EdC Labeled n12 Viral Genomes can be Visualized within Infected Cell**  
982 **Nuclei and Form Replication Compartments When ICP4 is Supplied in Trans.** Vero or  
983 E5 cells were infected with KOS-EdC or n12-EdC and were fixed for imaging at 3 or 6 hpi.  
984 Viral genomes (green) and ICP4 (red) were imaged relative to host nuclei (blue). Related to  
985 Figures 4 and 5.

986

987 **Figure S5. KOS and n12 Virions Contain the Same Viral Protein Components.** MS  
988 analysis of viral proteins associated with purified KOS and n12 virions. Related to Figure 4.  
989 See also Table S2.

990

991 **Table S1. The Effects of EdC Labeling on Viral Genome to PFU Ratio.** Virus stocks were  
992 prepared in the presence or absence of EdC (KOS-10  $\mu$ M, n12-5  $\mu$ M final concentration) and  
993 genome number and PFU were determined by real-time PCR and plaque assay, respectively.  
994 n12 virus stocks were prepared and titered in the ICP4 complementing cell line, E5. Values  
995 indicate the number of genomes or PFU per  $\mu$ L of virus stock. Related to Figures 1 and 4.

996

997 **Tables S2. MS and SILAC data.**

Figure 1

A

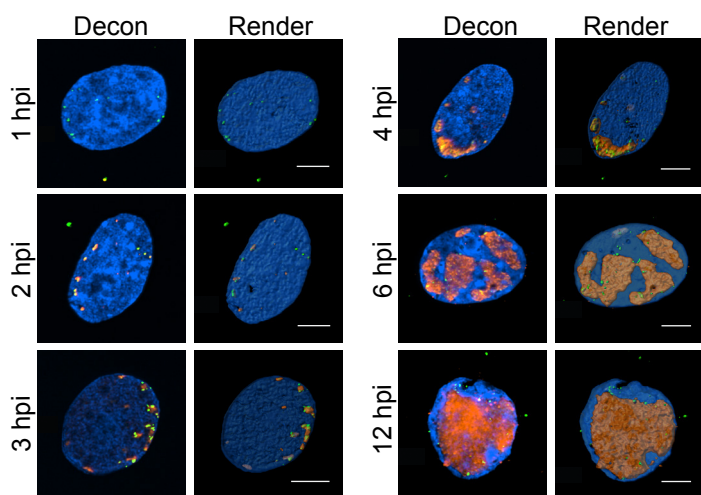

B

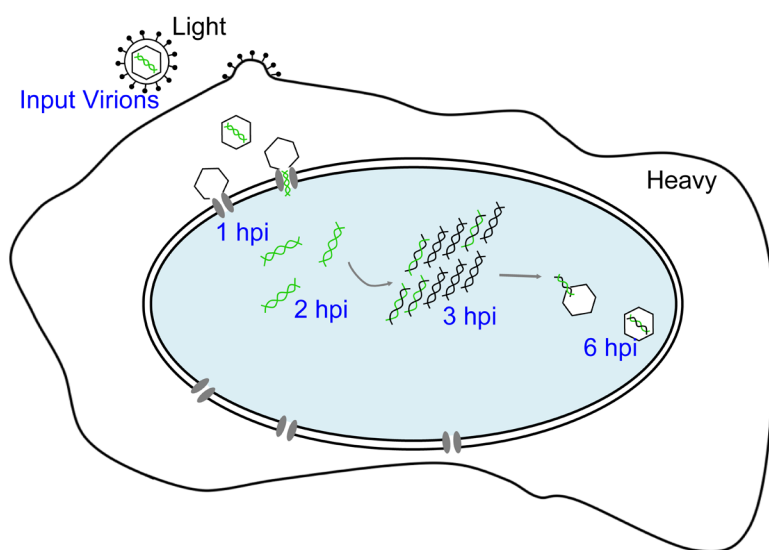

C

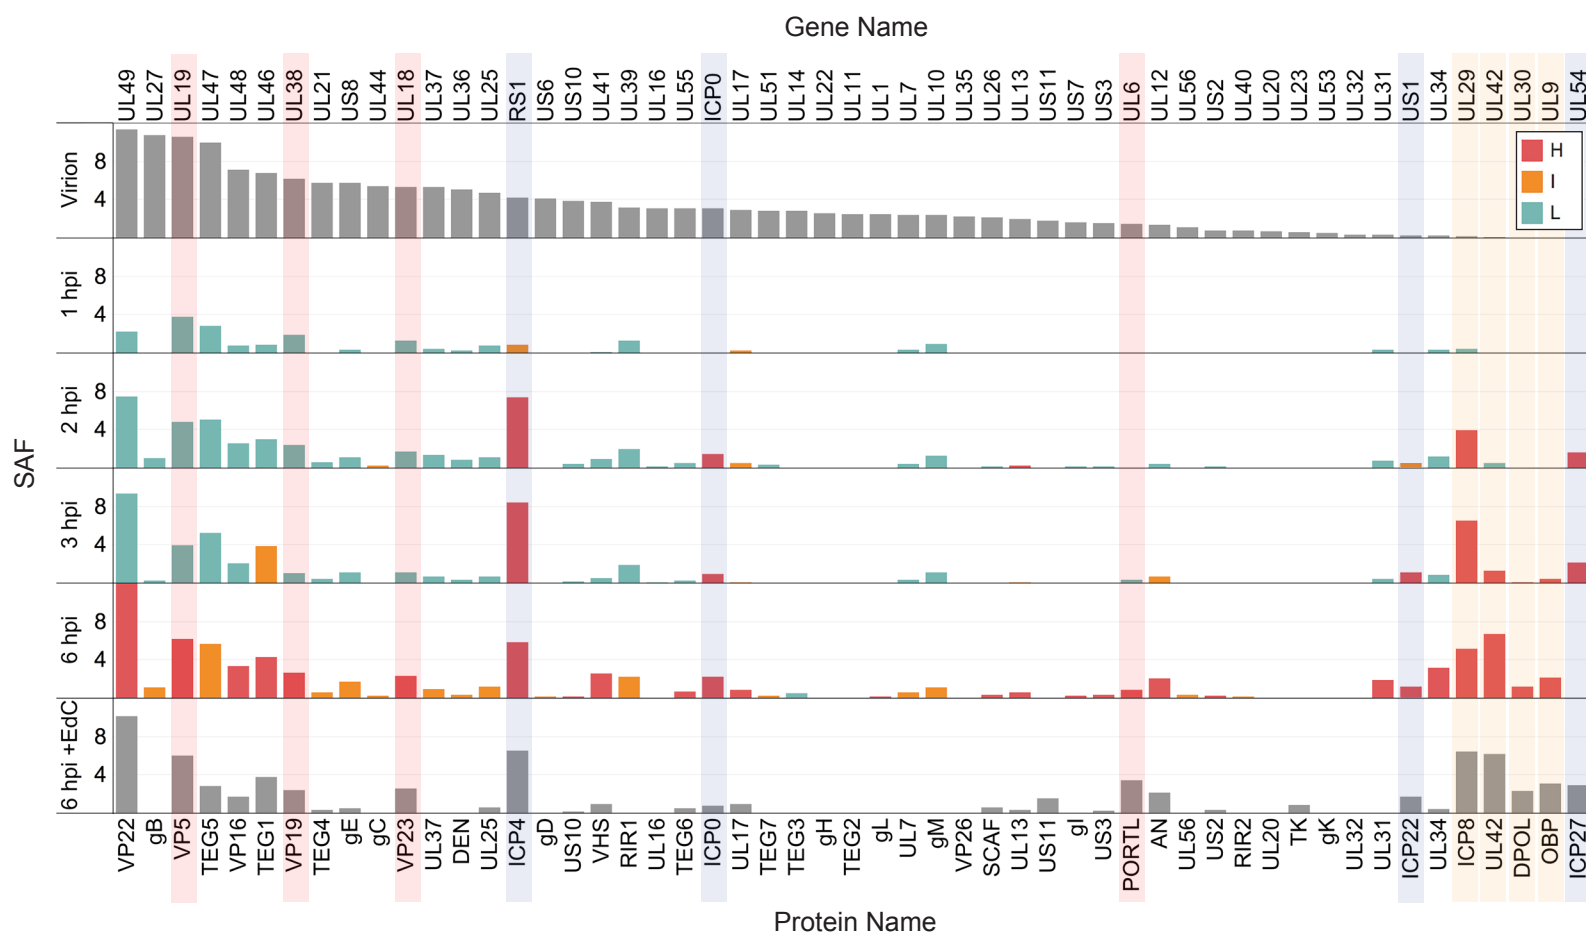

A

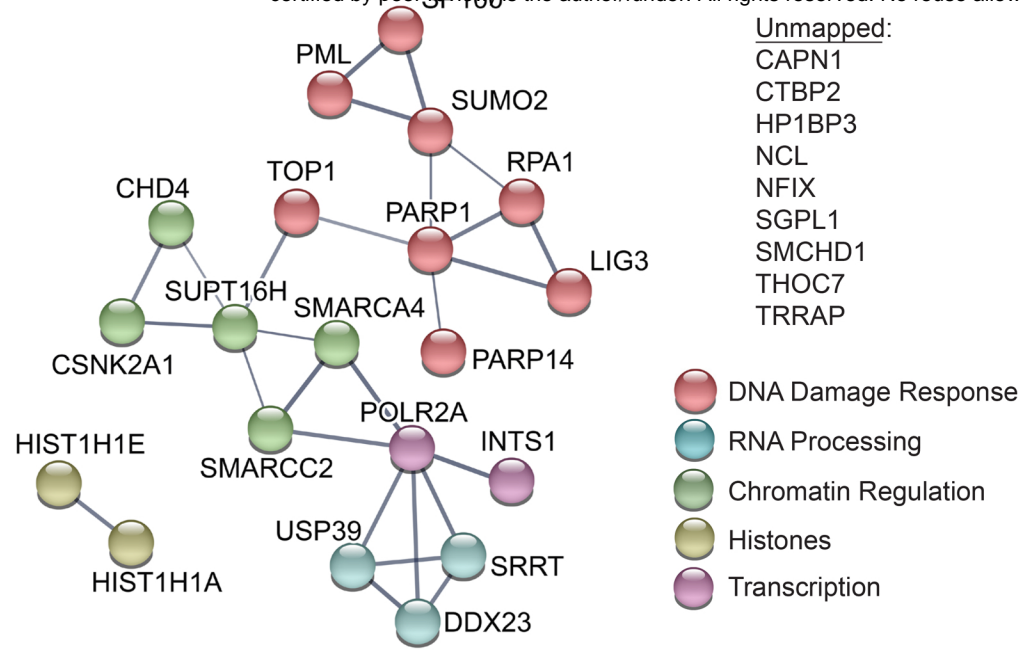

B

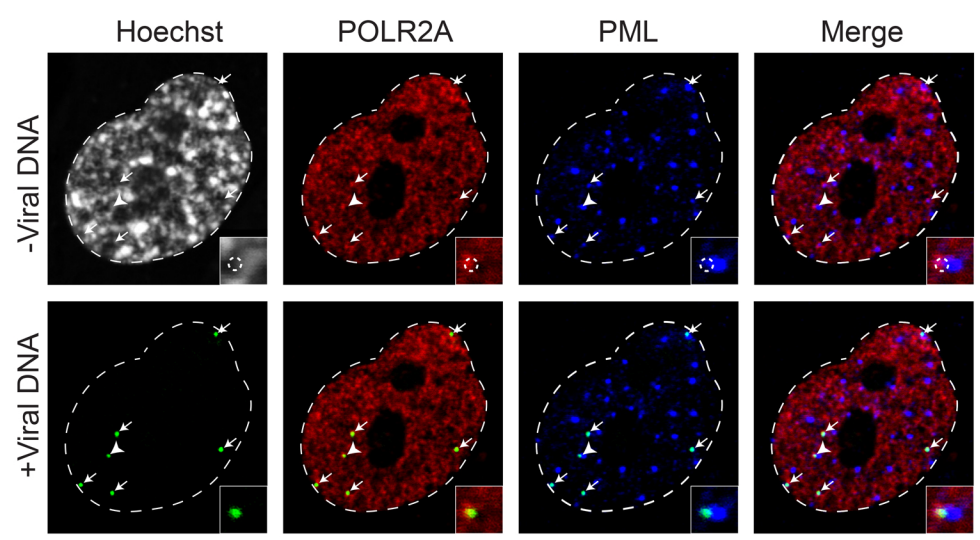



A

Unmapped:

ATAD3B  
CAPN1  
CAPNS1  
CENPV  
CHD2  
COL1A1  
H2AFY2  
HP1BP3  
HSPD1  
IFI16  
KIAA1429  
PARP14  
SAFB  
SERBP1  
SMCHD1  
TMPO  
WDR82

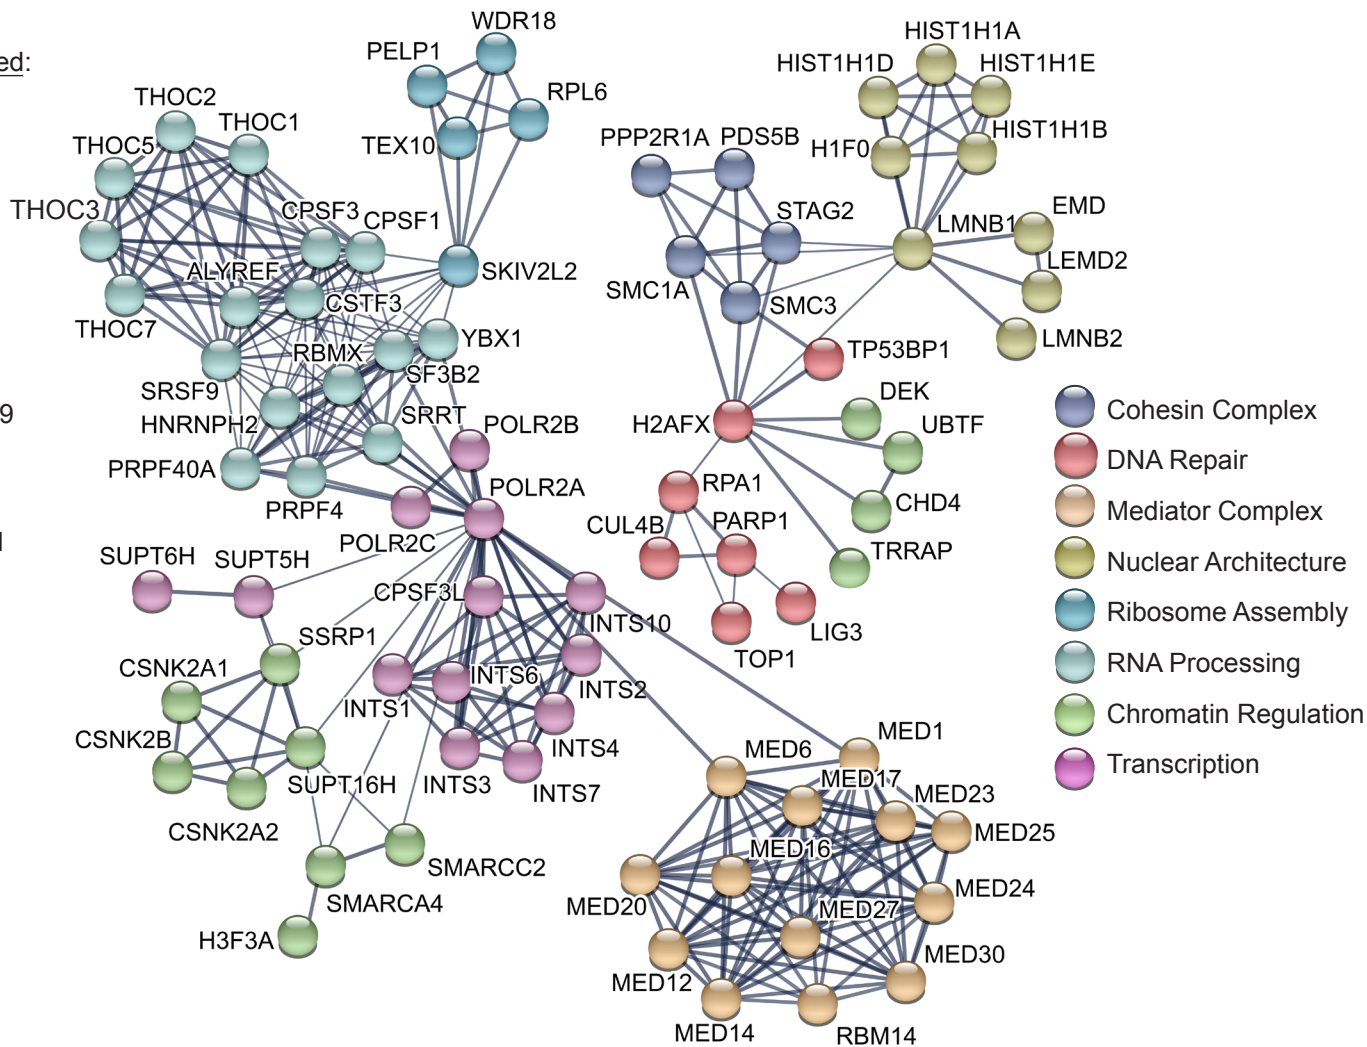

B

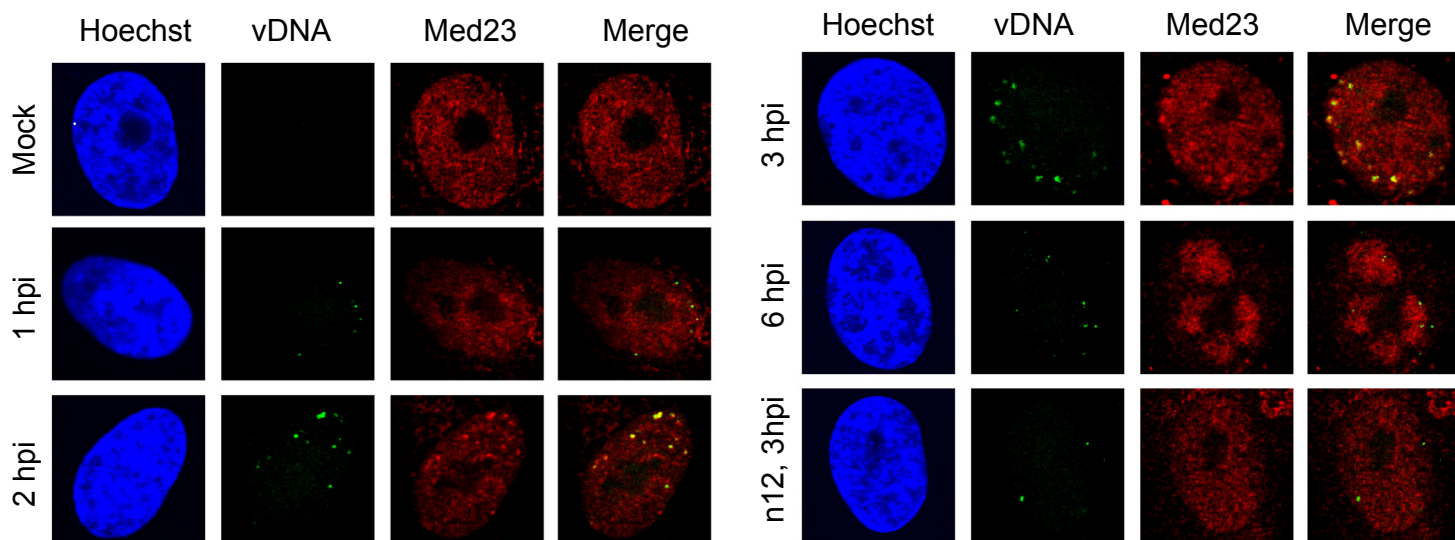

Figure 4

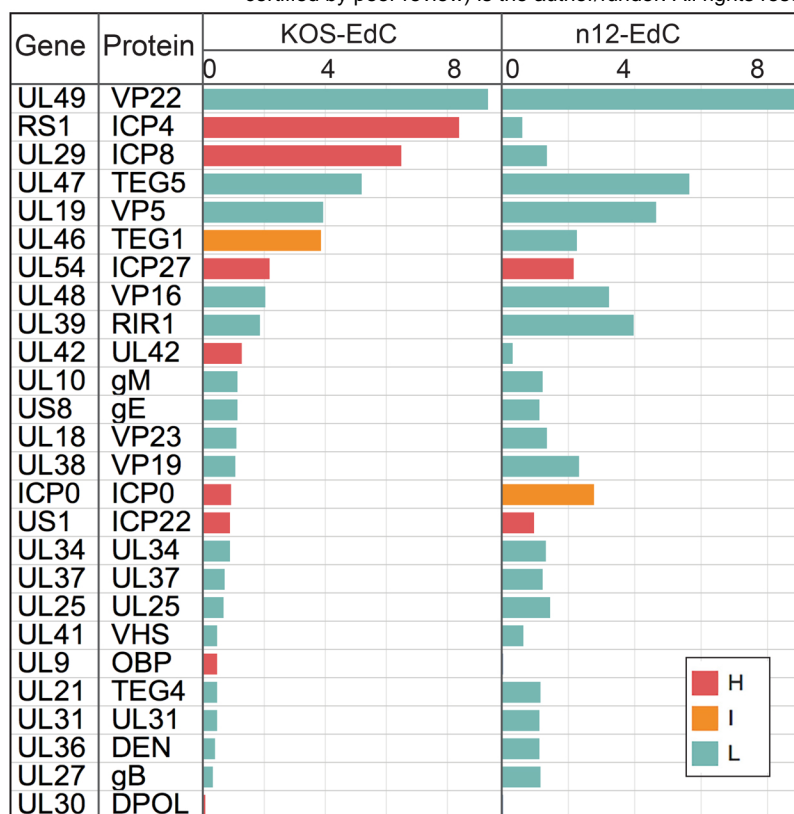

A

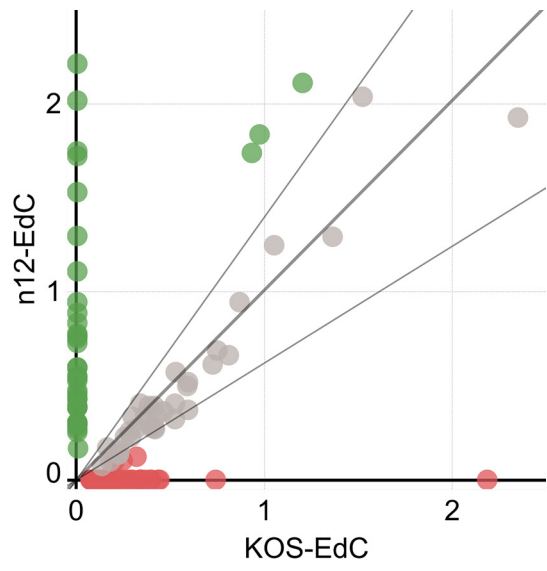

C

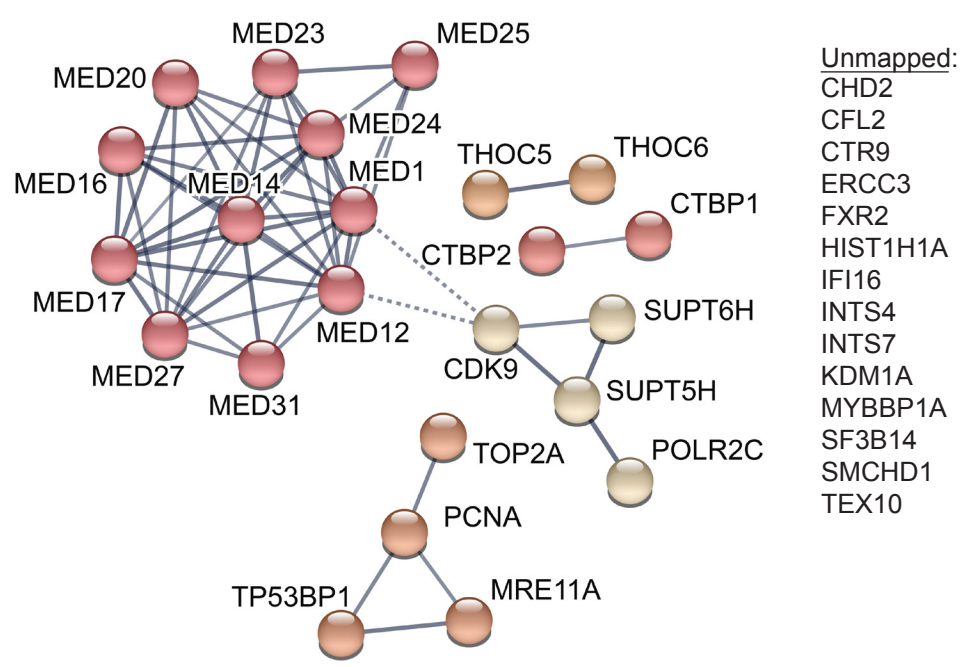

B

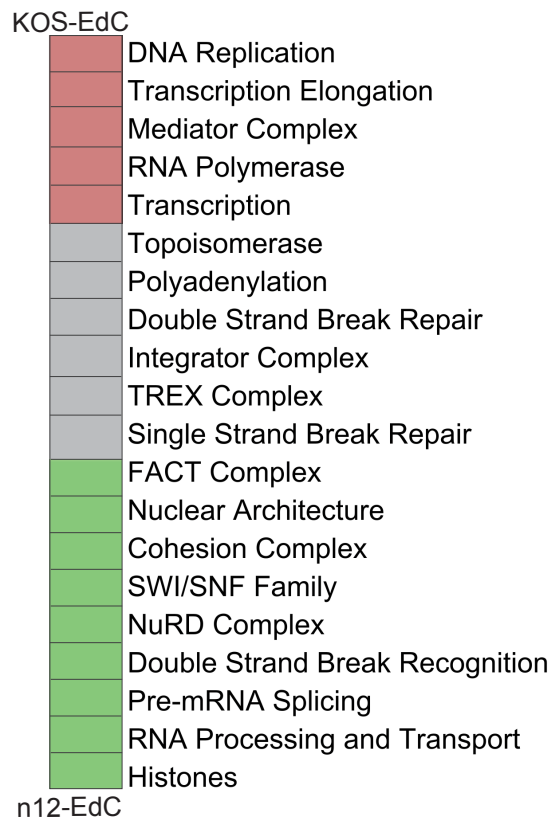

D

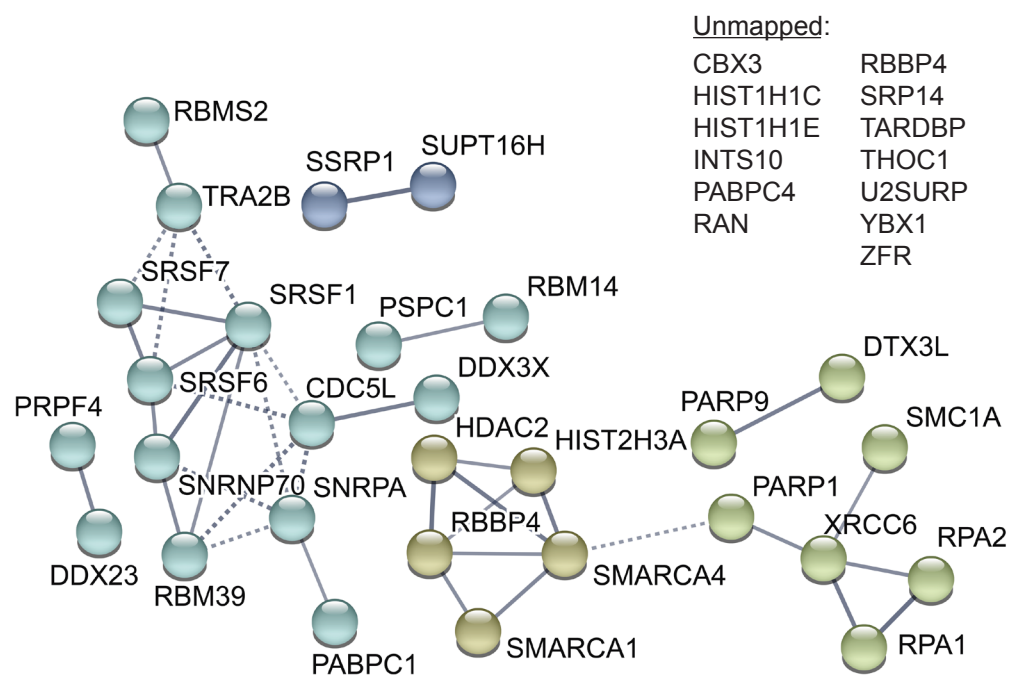



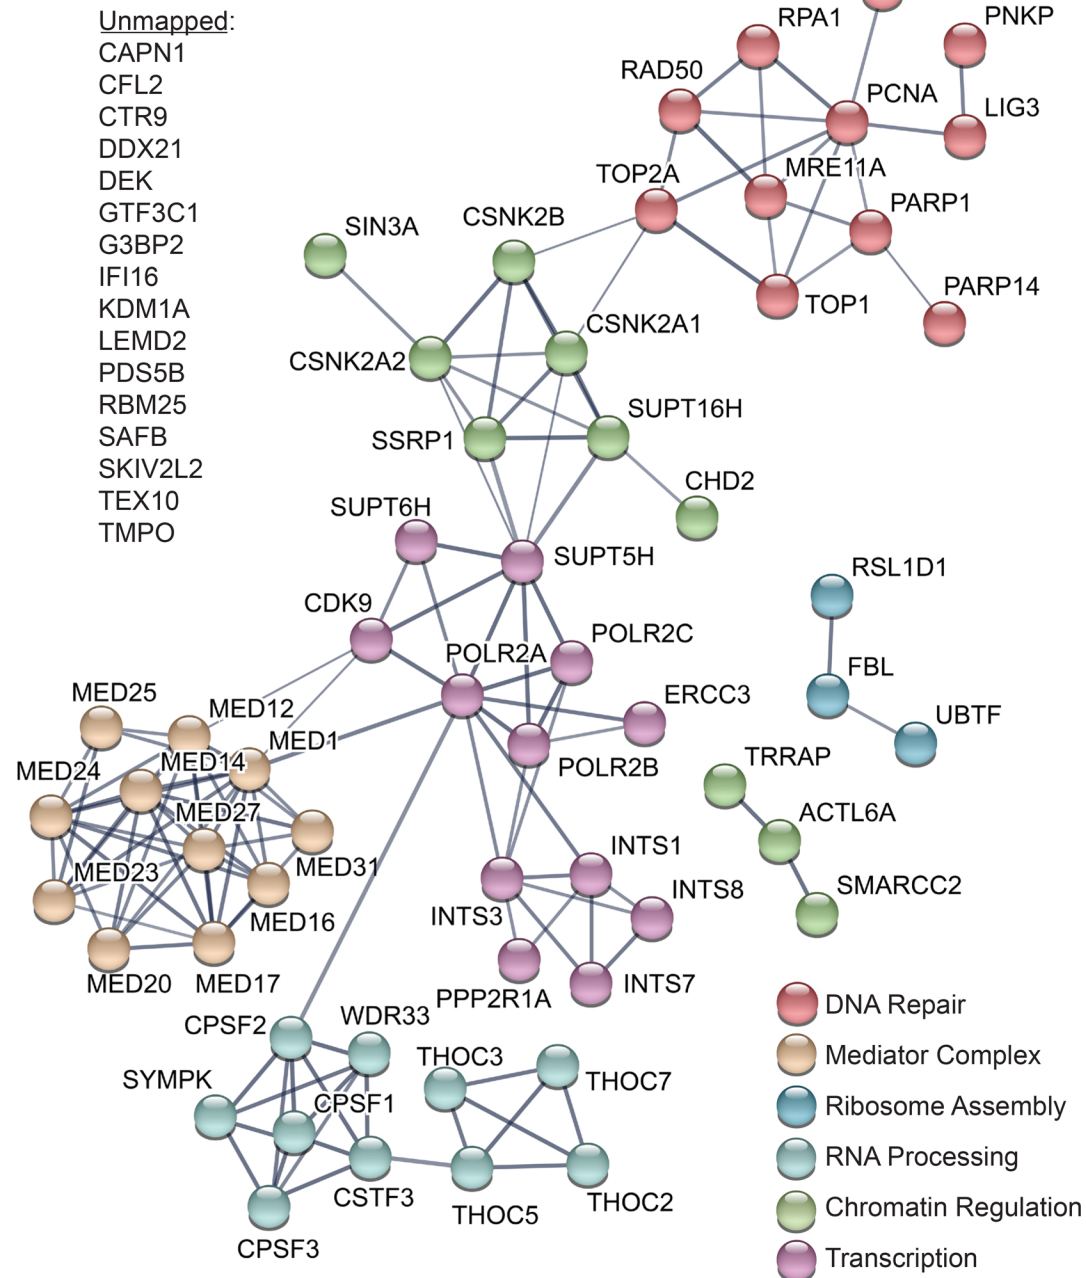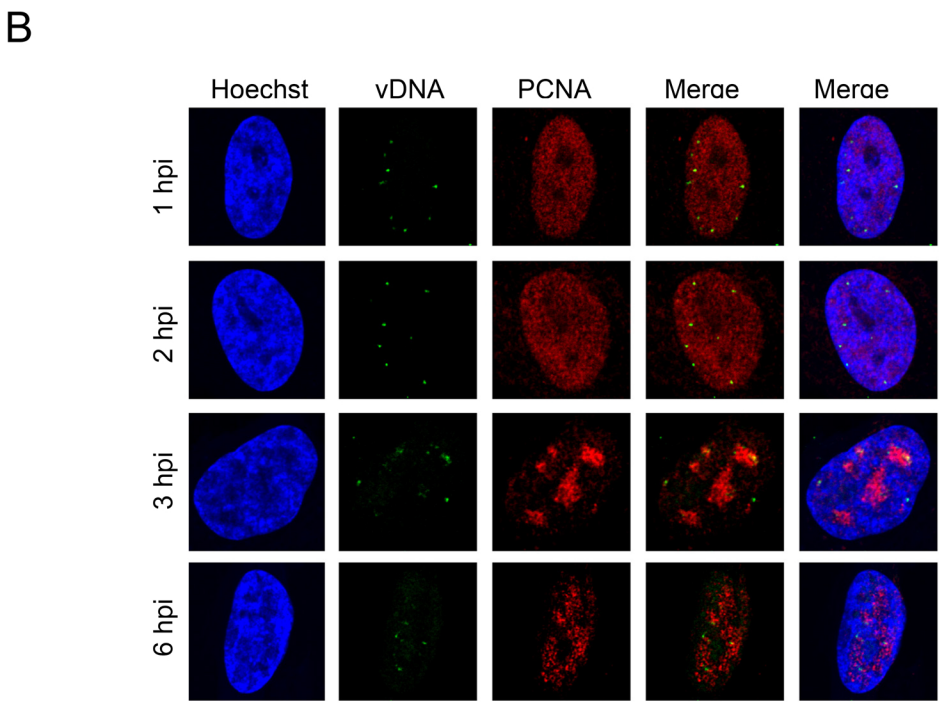

A

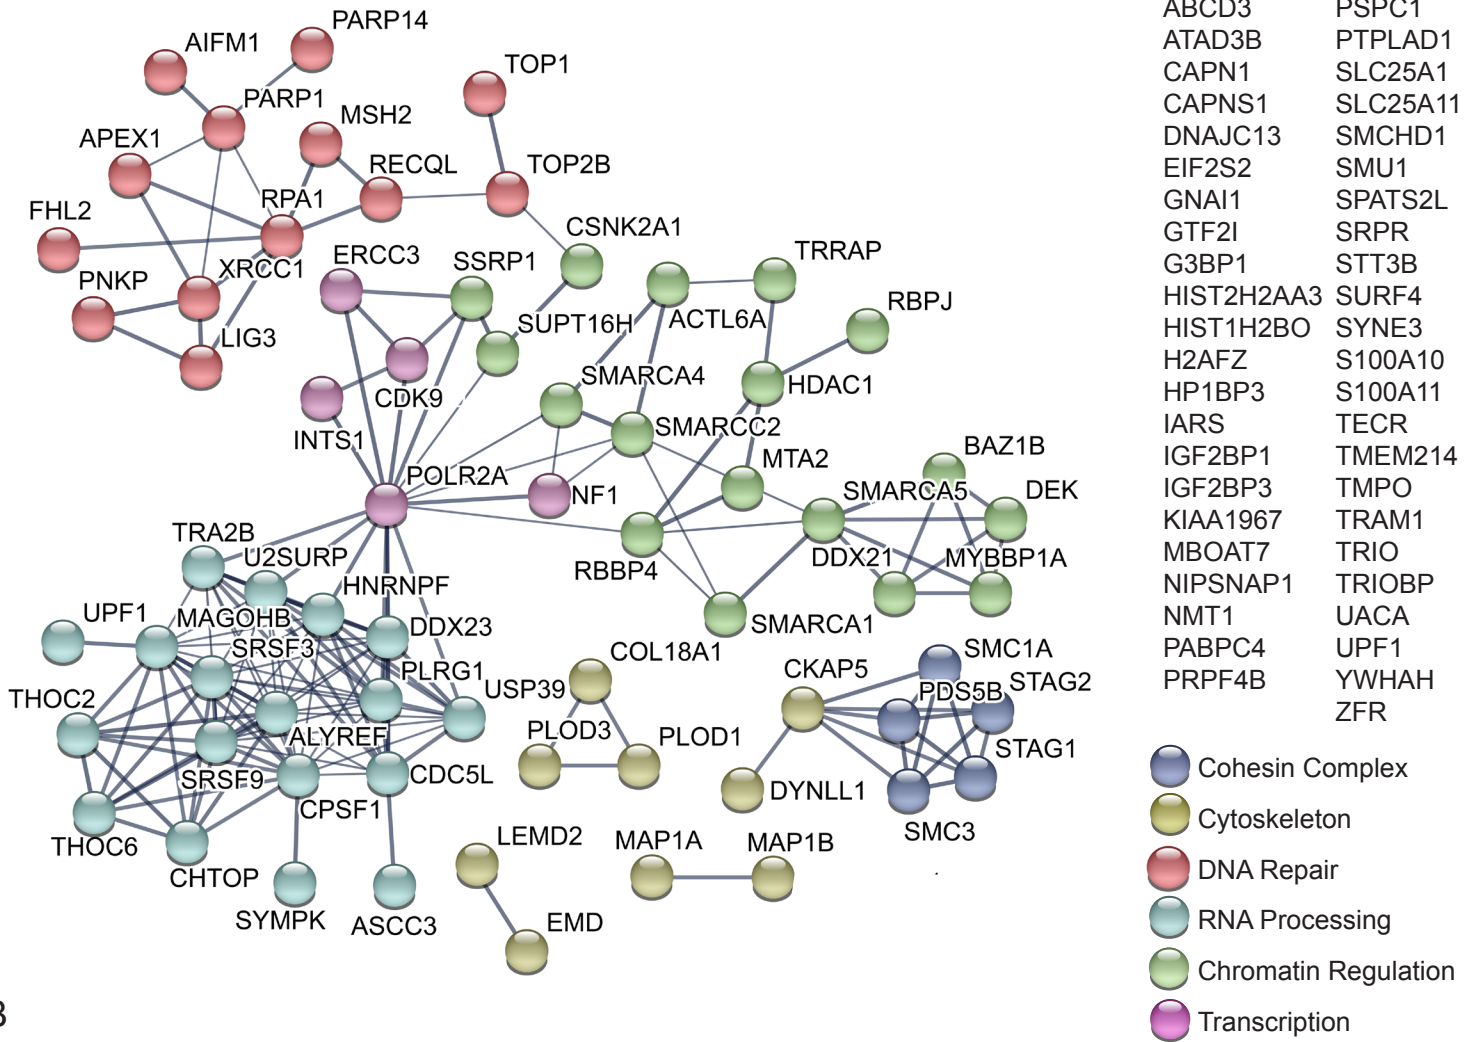

B

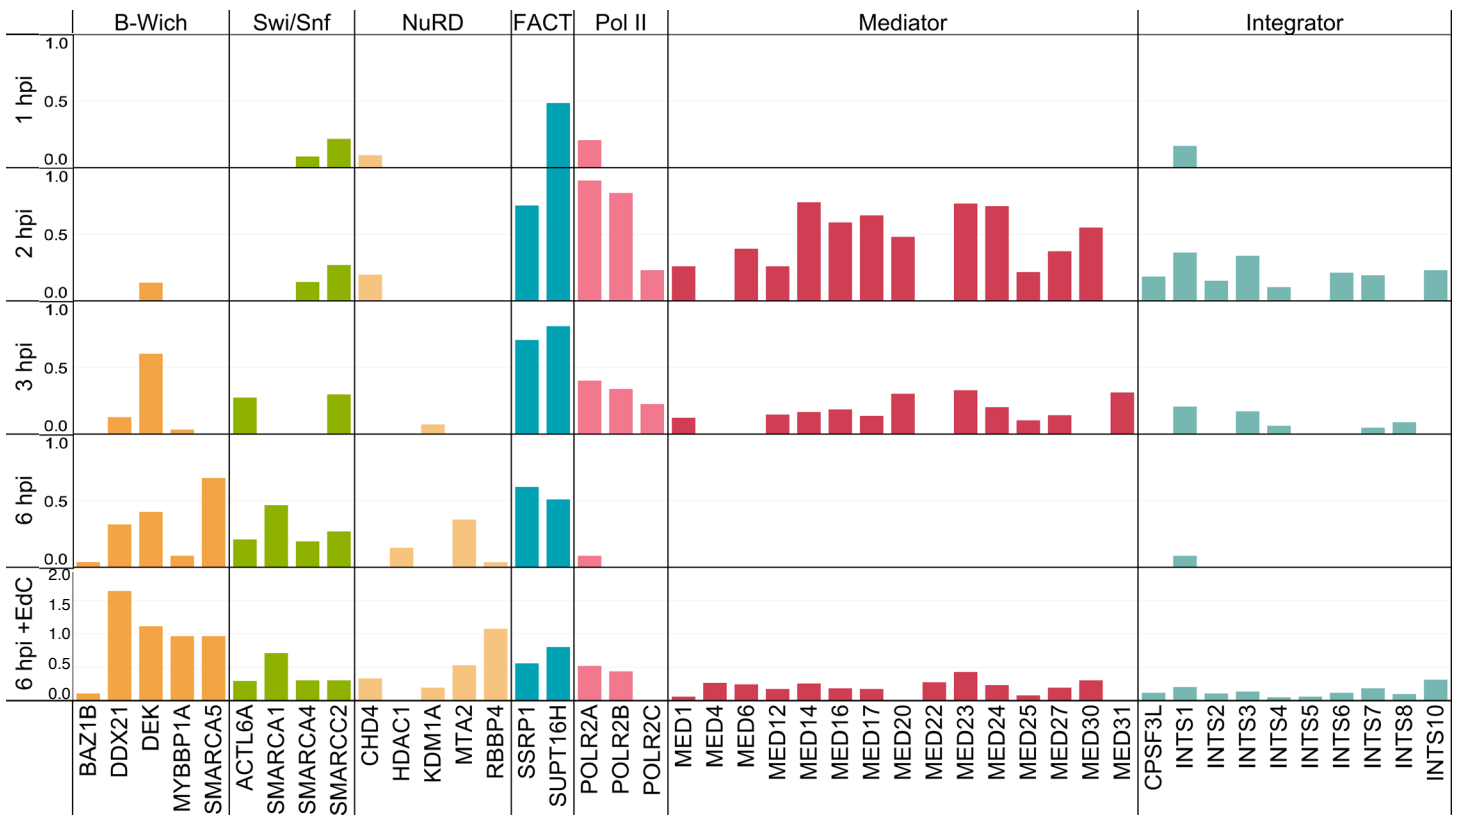

Source: http://biorxiv.org/content/10.1101/331272v1.full.pdf
